# Supplementary material for: Highly efficient pincer nickel catalyzed cross-coupling of aryltrimethylammonium triflates with arylzinc reagents
Source: Royal Society of Chemistry journal article supplement (doi:10.1039/c4qo00321g), 2015-01-01

Electronic Supplementary Information

## Highly efficient pincer-nickel-catalyzed cross-coupling of aryltrimethylammonium triflates with arylzinc reagents

Dan Wu, Jian-Long Tao and Zhong-Xia Wang

Department of Chemistry, University of Science and Technology of China, Hefei, Anhui 230026, China, and Collaborative Innovation Center of Chemical Science and Engineering (Tianjin), Tianjin 300072, China

Table S1. Cross-coupling of arylzinc chlorides with aryltrimethyl ammonium triflates catalyzed using **5a** (0.01 mol %) as catalyst<sup>a</sup>

$$\text{ArNMe}_3^+\text{OTf}^- + \text{Ar}^1\text{ZnCl} \xrightarrow[\text{65}^\circ\text{C, 12 h}]{\text{5a (0.01 mol\%)} \text{ THF-NMP (2:1)}} \text{Ar-Ar}^1$$

| Entry | Ar                                                                                  | Ar <sup>1</sup> ZnCl                                          | Yield (%) <sup>b</sup> |
|-------|-------------------------------------------------------------------------------------|---------------------------------------------------------------|------------------------|
| 1     | 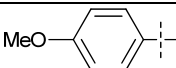 | <i>p</i> -MeC <sub>6</sub> H <sub>4</sub> ZnCl                | 14                     |
| 2     |  | <i>p</i> -Me <sub>2</sub> NC <sub>6</sub> H <sub>4</sub> ZnCl | 13                     |
| 3     |  | <i>p</i> -MeC <sub>6</sub> H <sub>4</sub> ZnCl                | 84                     |
| 4     |  | <i>p</i> -MeOC <sub>6</sub> H <sub>4</sub> ZnCl               | 84                     |
| 5     |  | <i>o</i> -MeC <sub>6</sub> H <sub>4</sub> ZnCl                | 40                     |
| 6     |  | <i>p</i> -CF <sub>3</sub> C <sub>6</sub> H <sub>4</sub> ZnCl  | 69                     |
| 7     |  | <i>p</i> -CF <sub>3</sub> C <sub>6</sub> H <sub>4</sub> ZnCl  | 65                     |
| 8     |  | <i>p</i> -CF <sub>3</sub> C <sub>6</sub> H <sub>4</sub> ZnCl  | 25                     |
| 9     |  | <i>p</i> -CF <sub>3</sub> C <sub>6</sub> H <sub>4</sub> ZnCl  | Trace                  |

<sup>a</sup>Unless otherwise specified, the reactions were carried out on a 0.5 mmol scale according to the conditions indicated by the above equation, 1.5 equiv. of ArZnCl were employed. The zinc reagents were prepared from ZnCl<sub>2</sub> and an equiv. of Grignard reagents in the presence of two equiv. of LiCl. <sup>b</sup> Isolated yield.

Table S2. Cross-coupling of 2-furyl- or 2-thienylzinc chloride with aryltrimethylammonium triflates using **5a** (0.01 mol %) as catalyst<sup>a</sup>

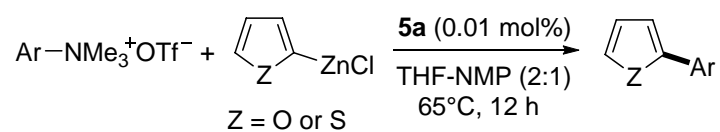

| Entry | Ar                                                                                       | HetArZnCl                                                                          | Yield (%) <sup>b</sup> |
|-------|------------------------------------------------------------------------------------------|------------------------------------------------------------------------------------|------------------------|
| 1     | PhOC- 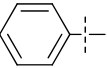  |  | 26                     |
| 2     | EtOOC-  |  | 64                     |
| 3     | EtOOC-  |  | <5%                    |
| 4     | PhOC-   |  | <5%                    |

<sup>a</sup> The reactions were carried out on a 0.5 mmol scale according to the conditions indicated by the above equation, 1.5 equiv. of ArZnCl were employed. The heteroarylzinc chlorides were prepared from ZnCl<sub>2</sub> and an equiv. of heteroaryllithium. <sup>b</sup> Isolated yield.

# Copies of $^1\text{H}$ and $^{13}\text{C}$ NMR spectra

## 1. 4-Methoxybiphenyl

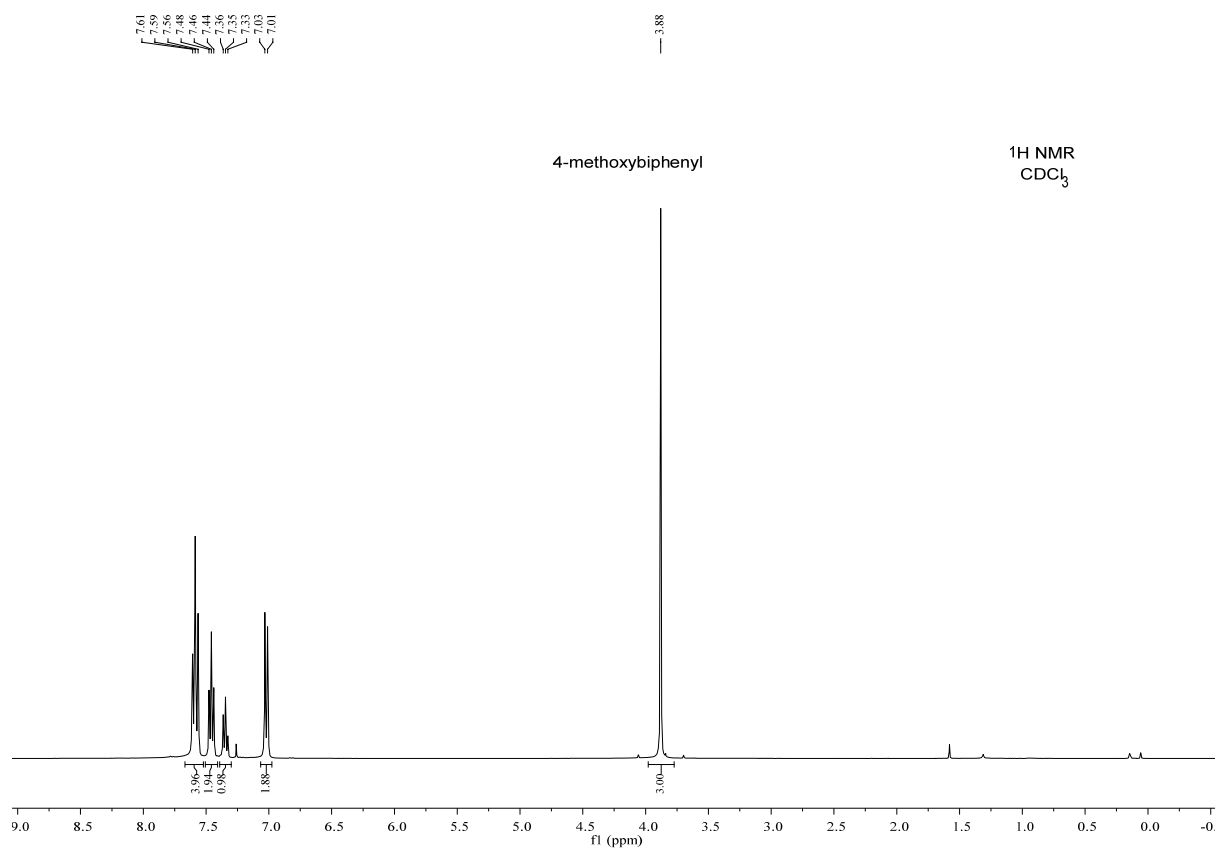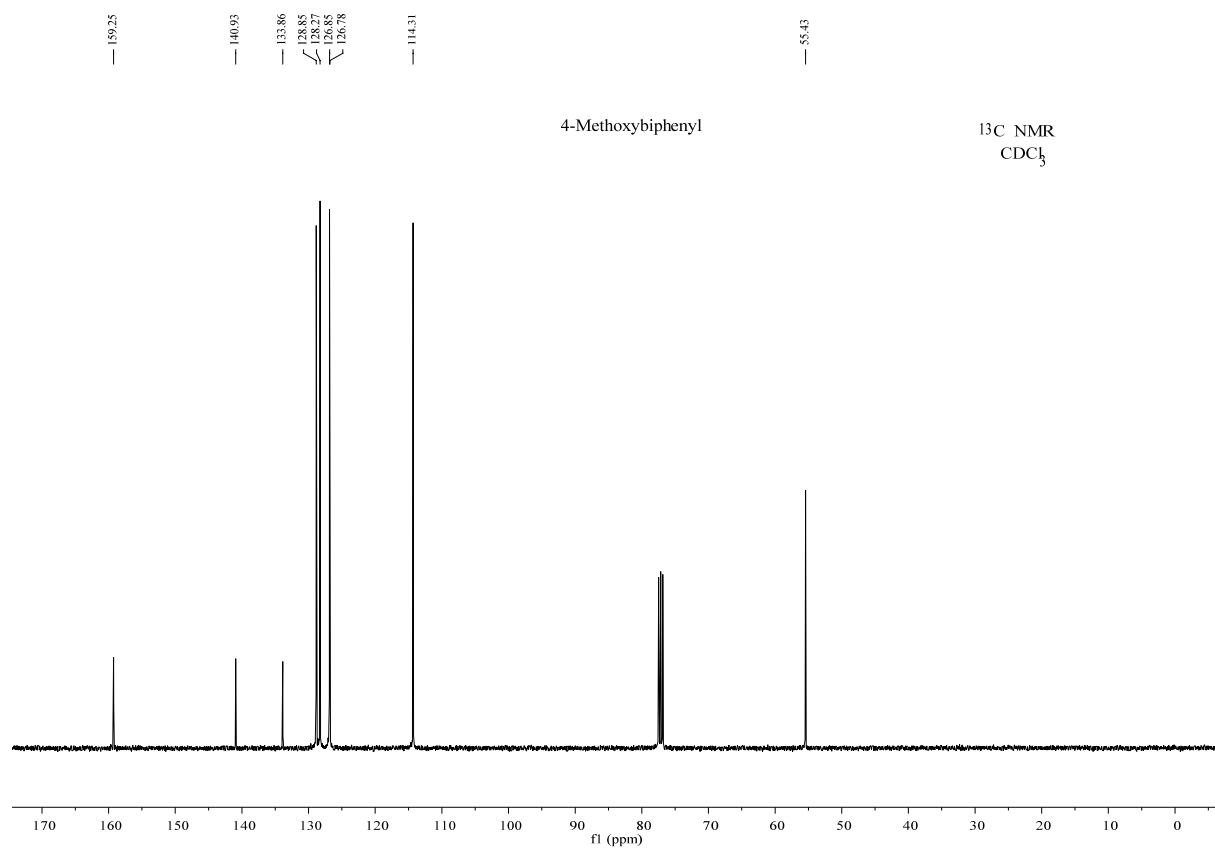

## 2. 1-(4-Methoxyphenyl)naphthalene

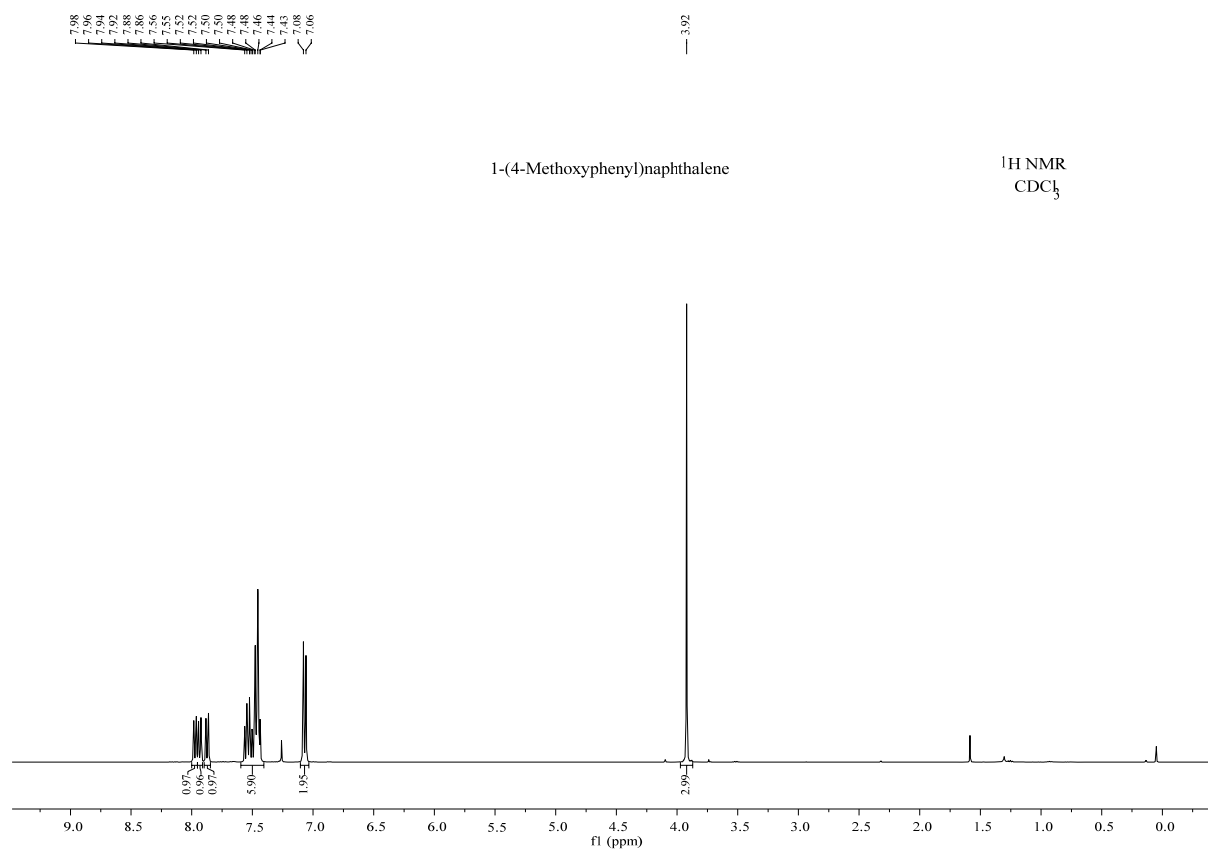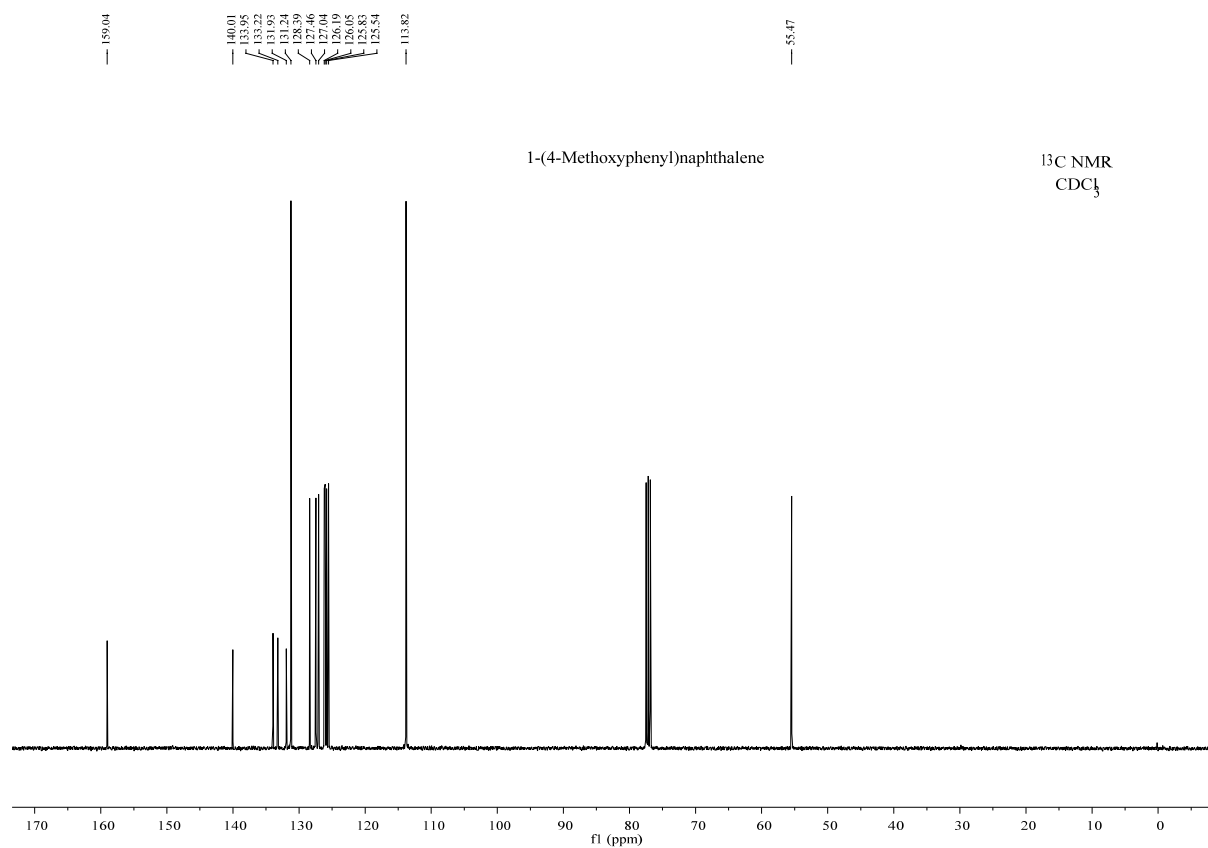

### 3. *N,N*-Dimethyl-(4-naphthalen-1-yl)aniline

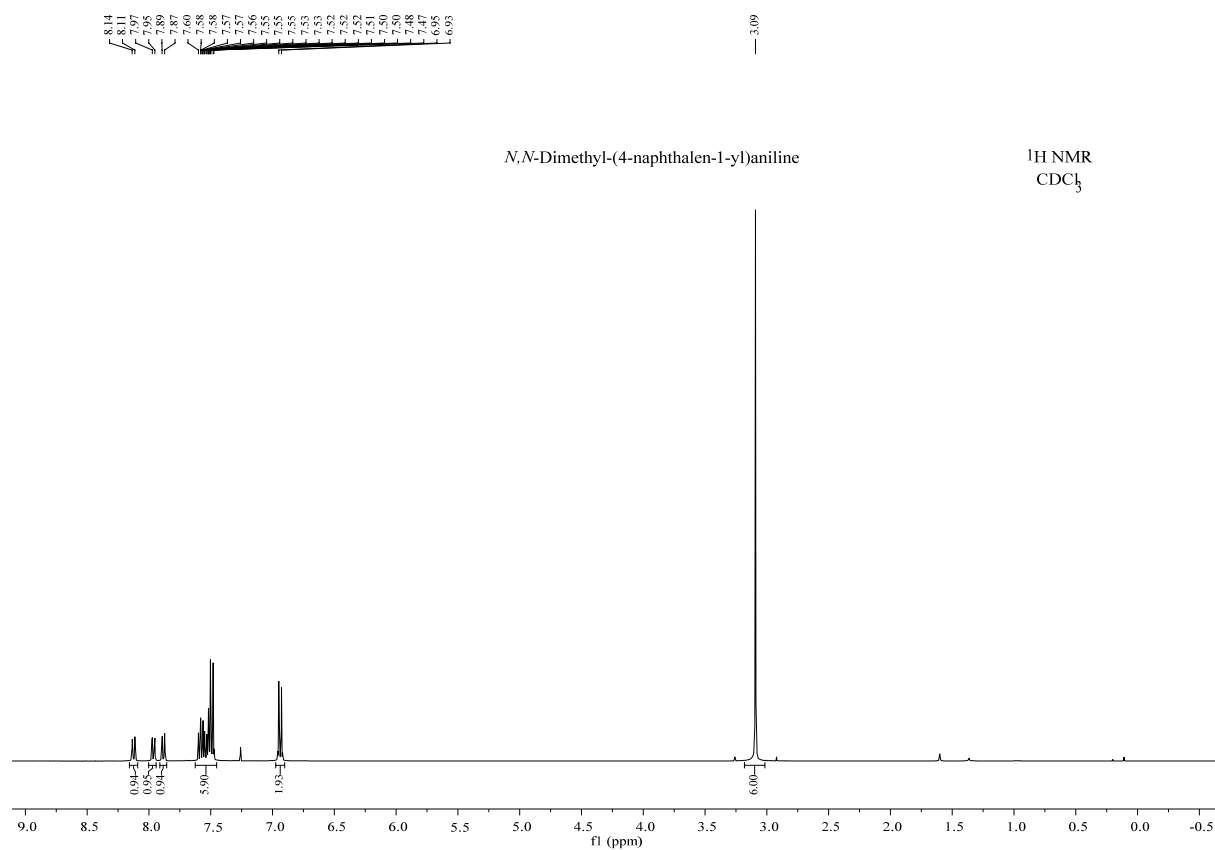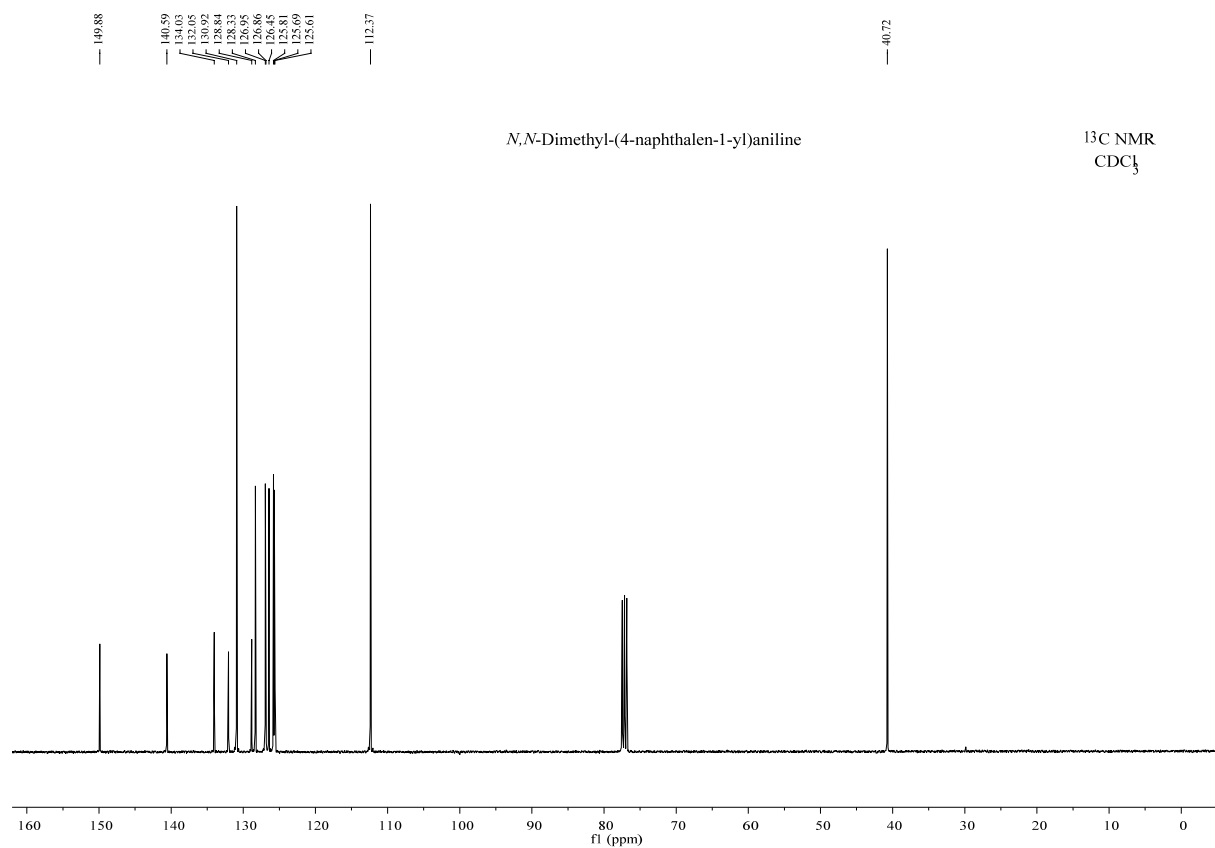

#### 4. 3-Methoxy-4'-methylbiphenyl

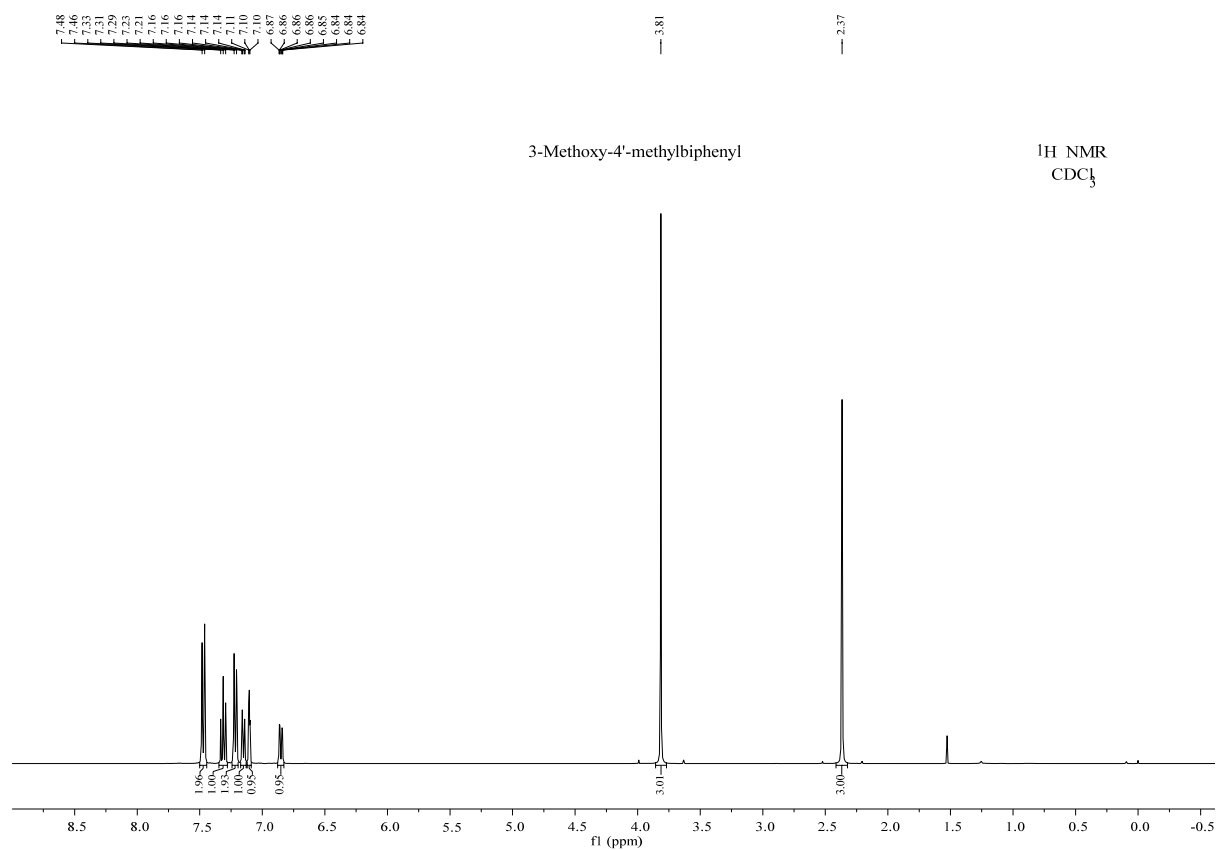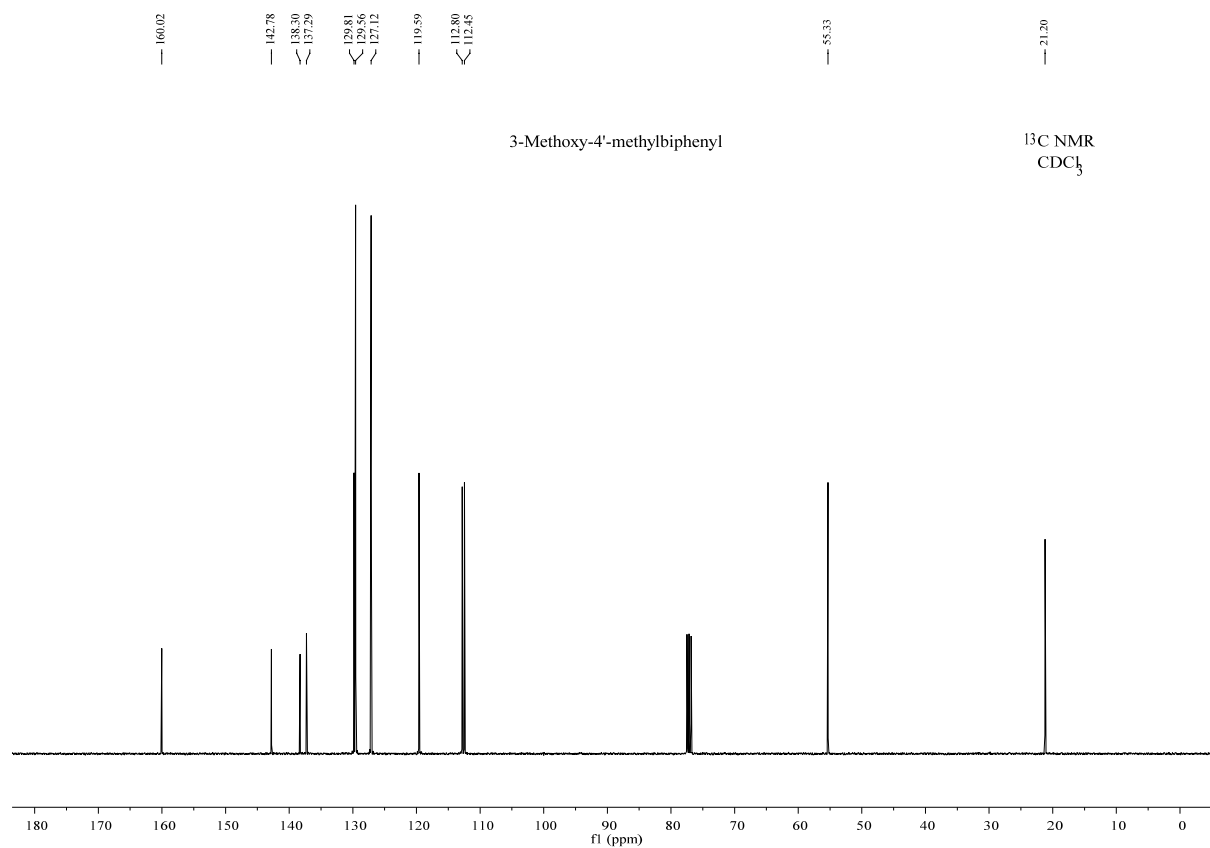

## 5. 4'-Methyl-[1,1'-biphenyl]-3-yl pivalate

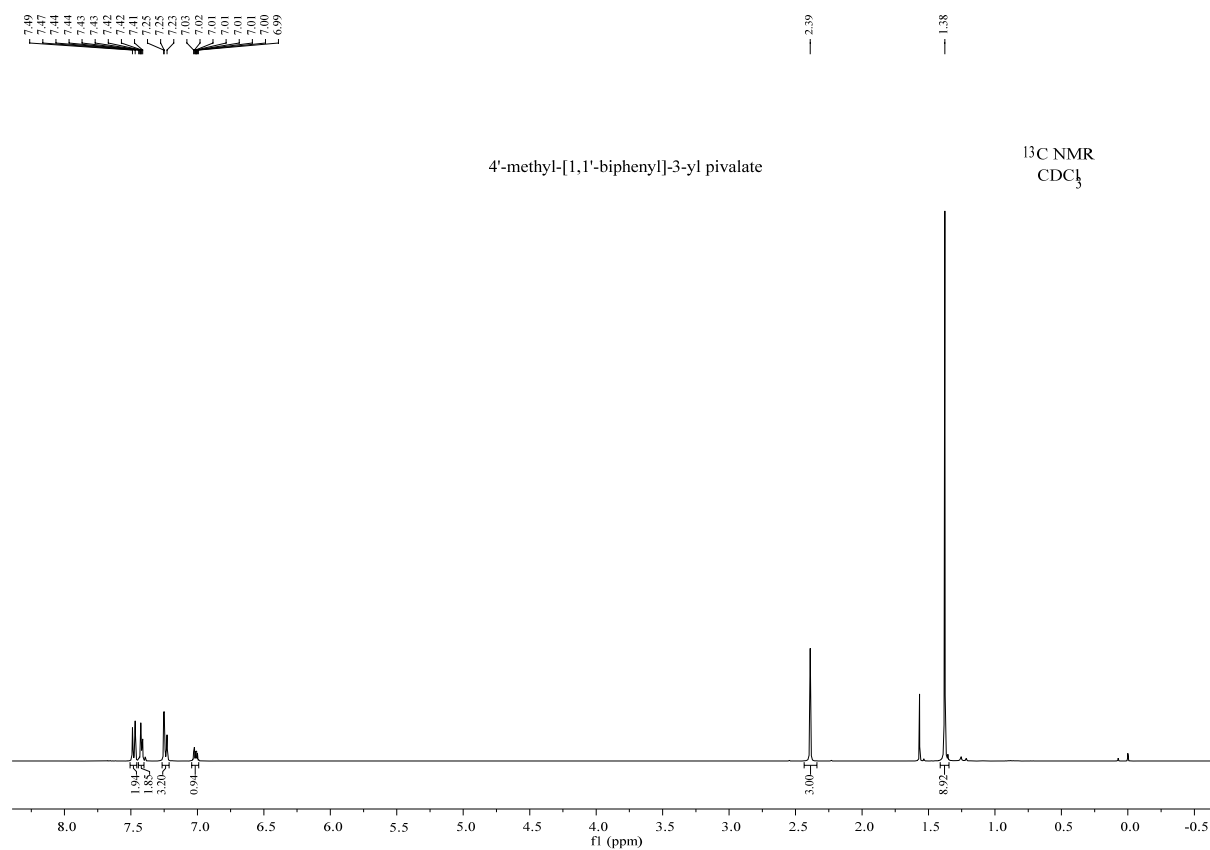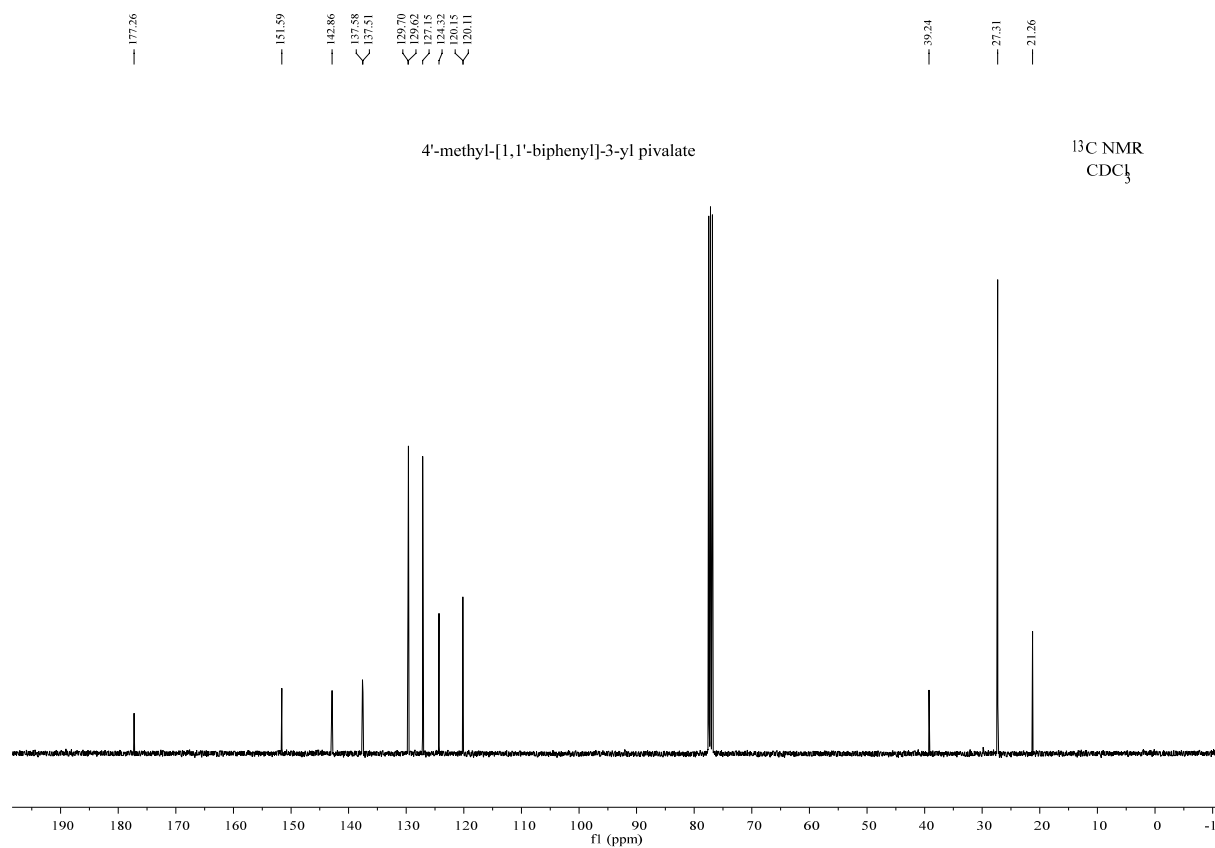

## 6. 4-Methoxy-4'-methylbiphenyl

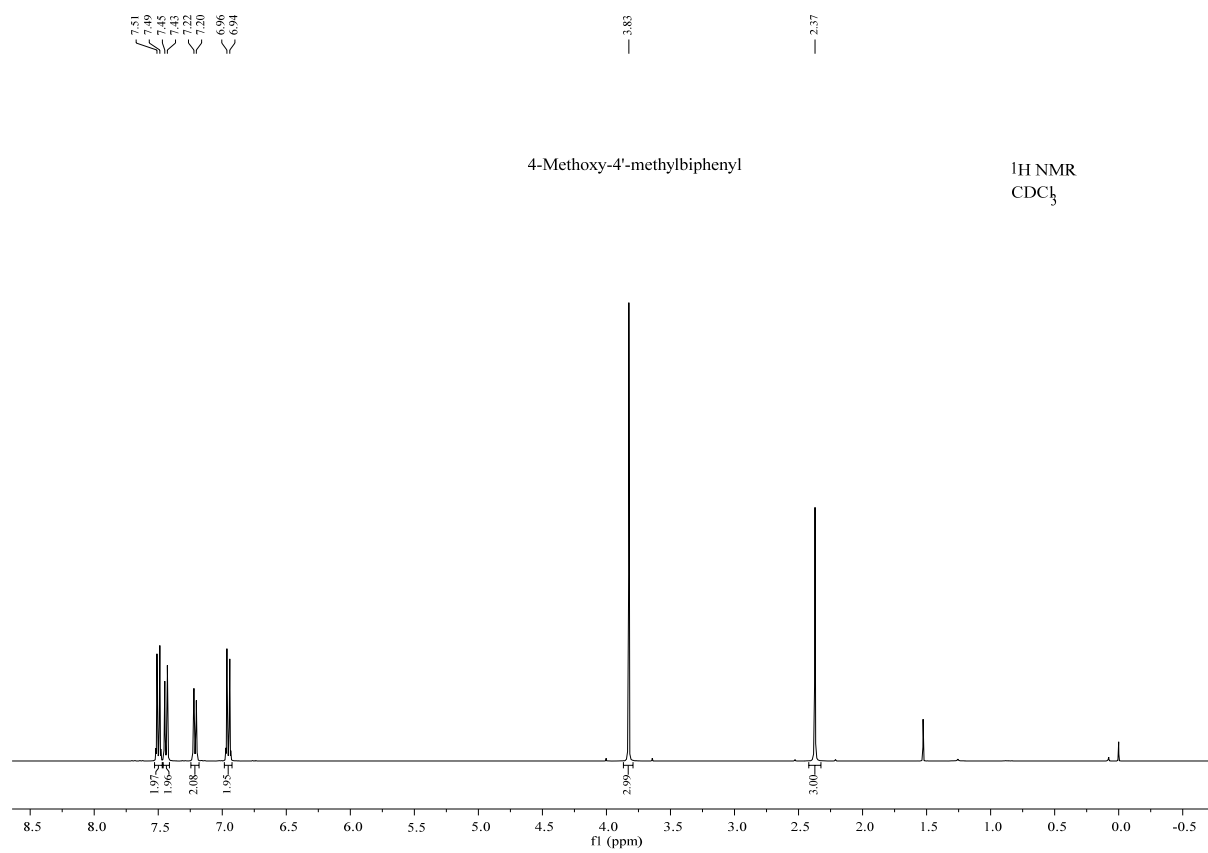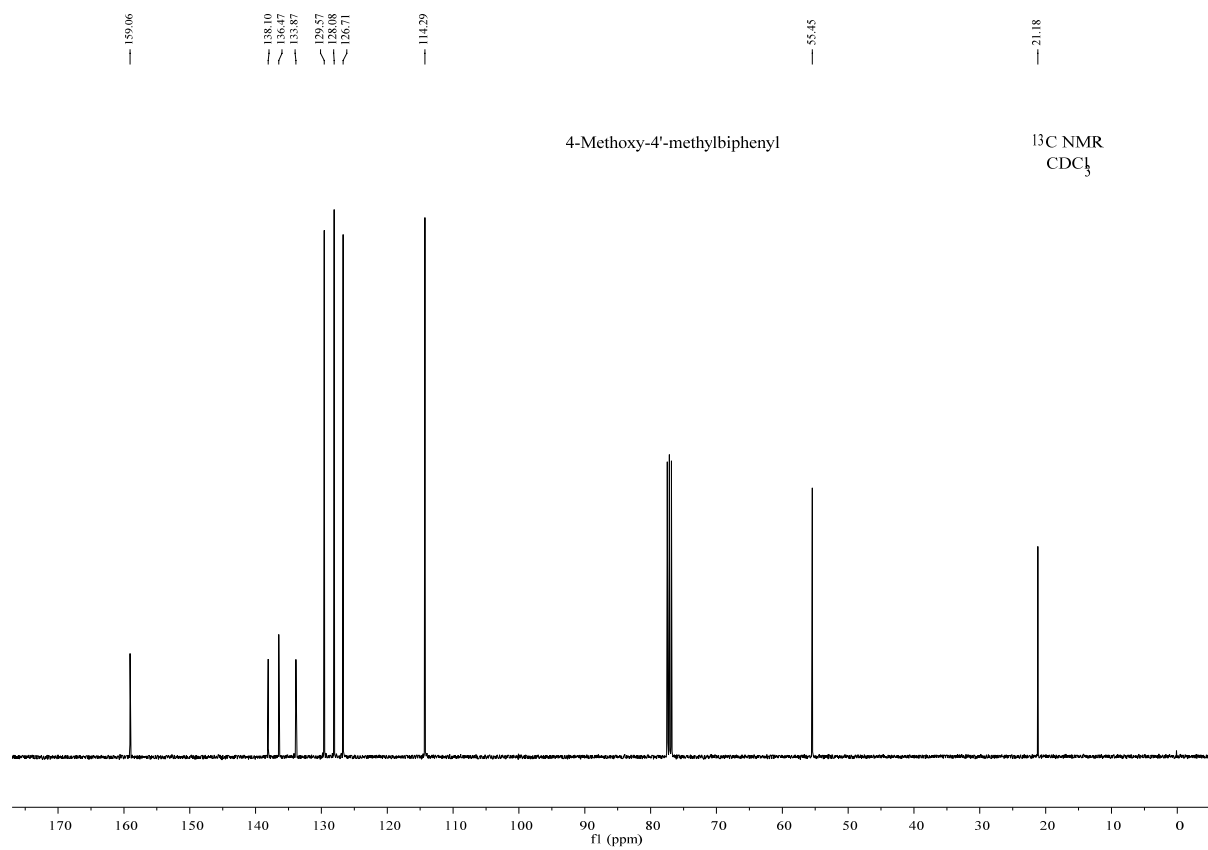



# 7. 4'-Methoxy-2-methylbiphenyl

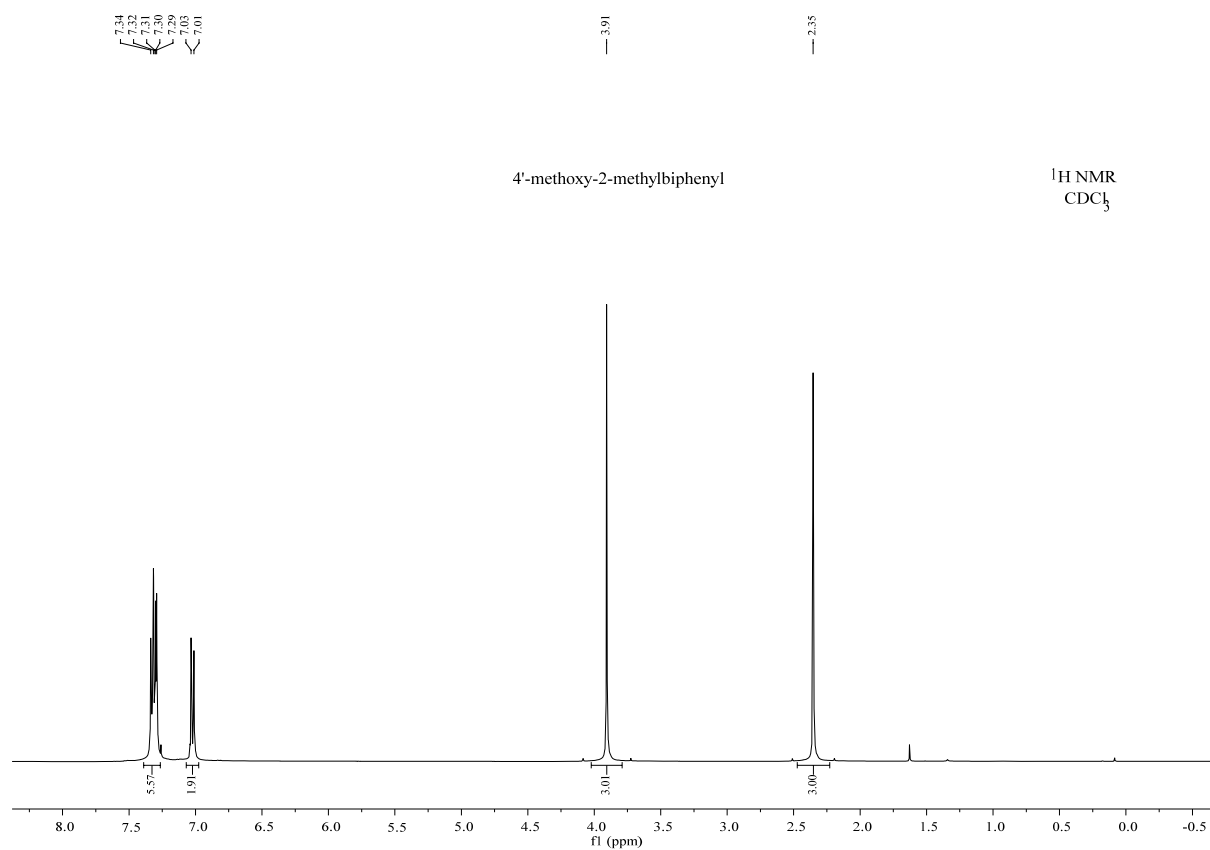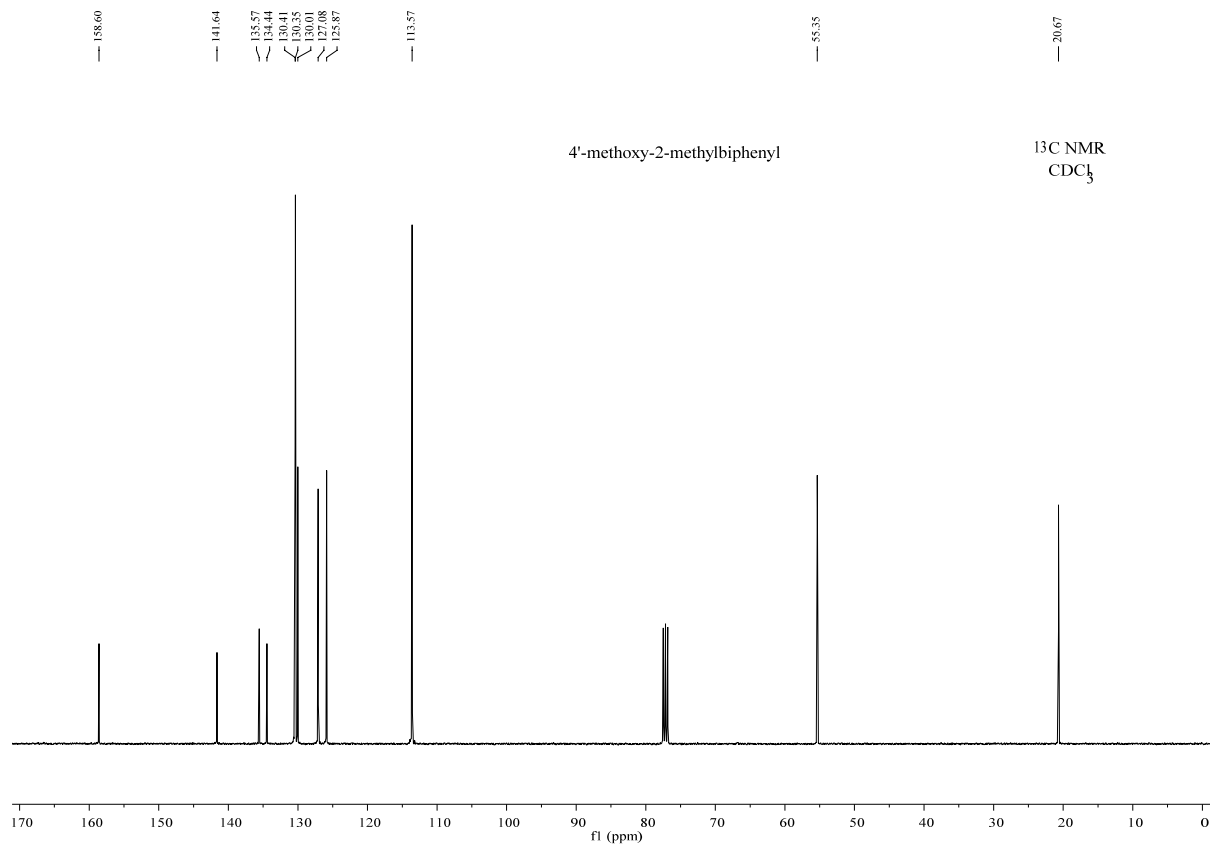

# 8. 4'-Methoxy-2,4,6-trimethyl-biphenyl

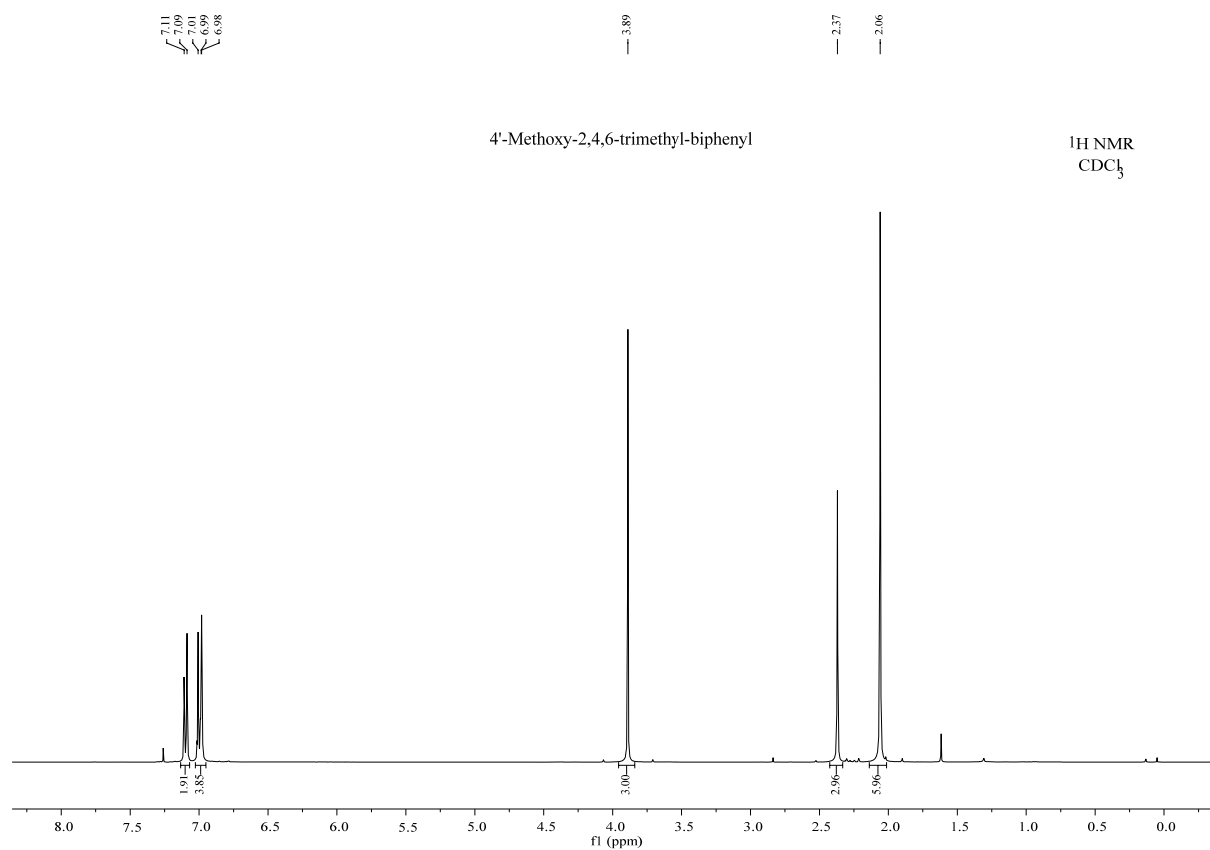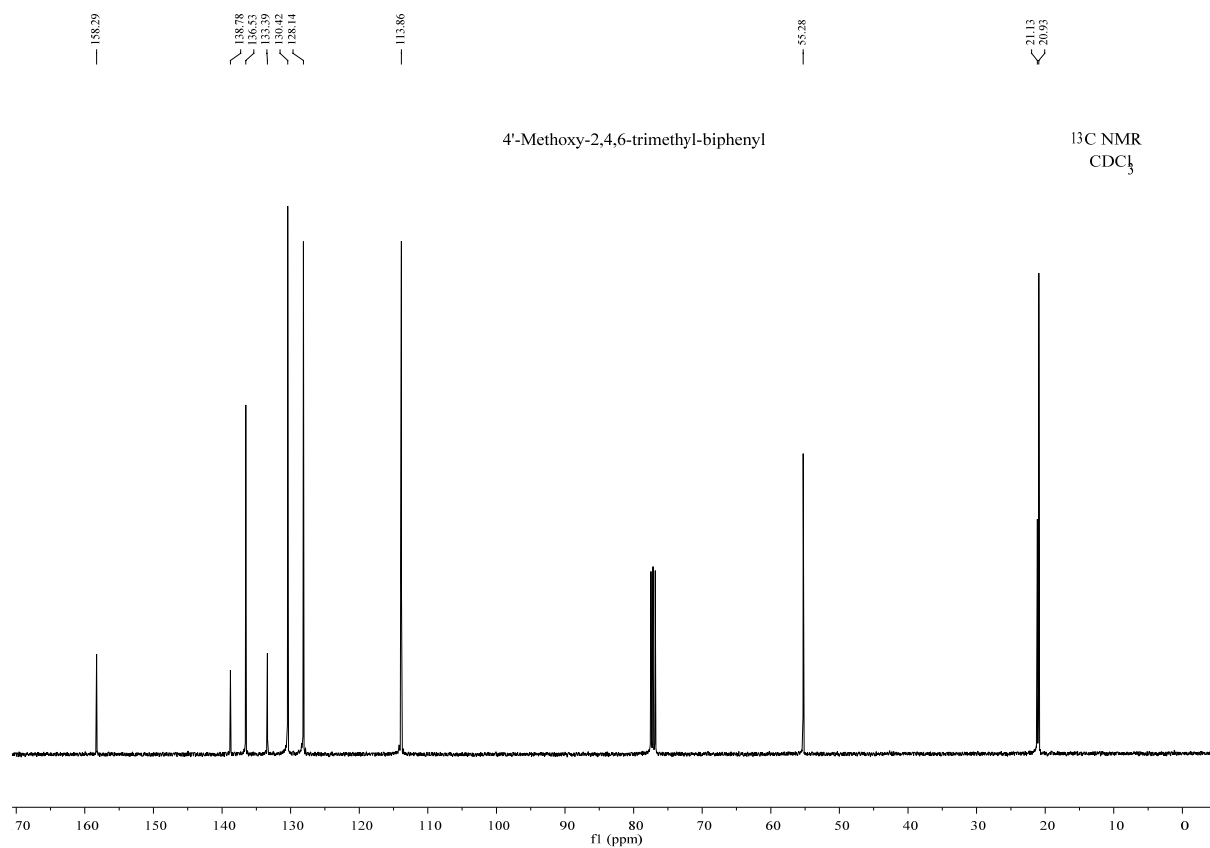

# 9. *N,N*, 3', 4', 5'- Pentamethylbiphenyl-4-amine

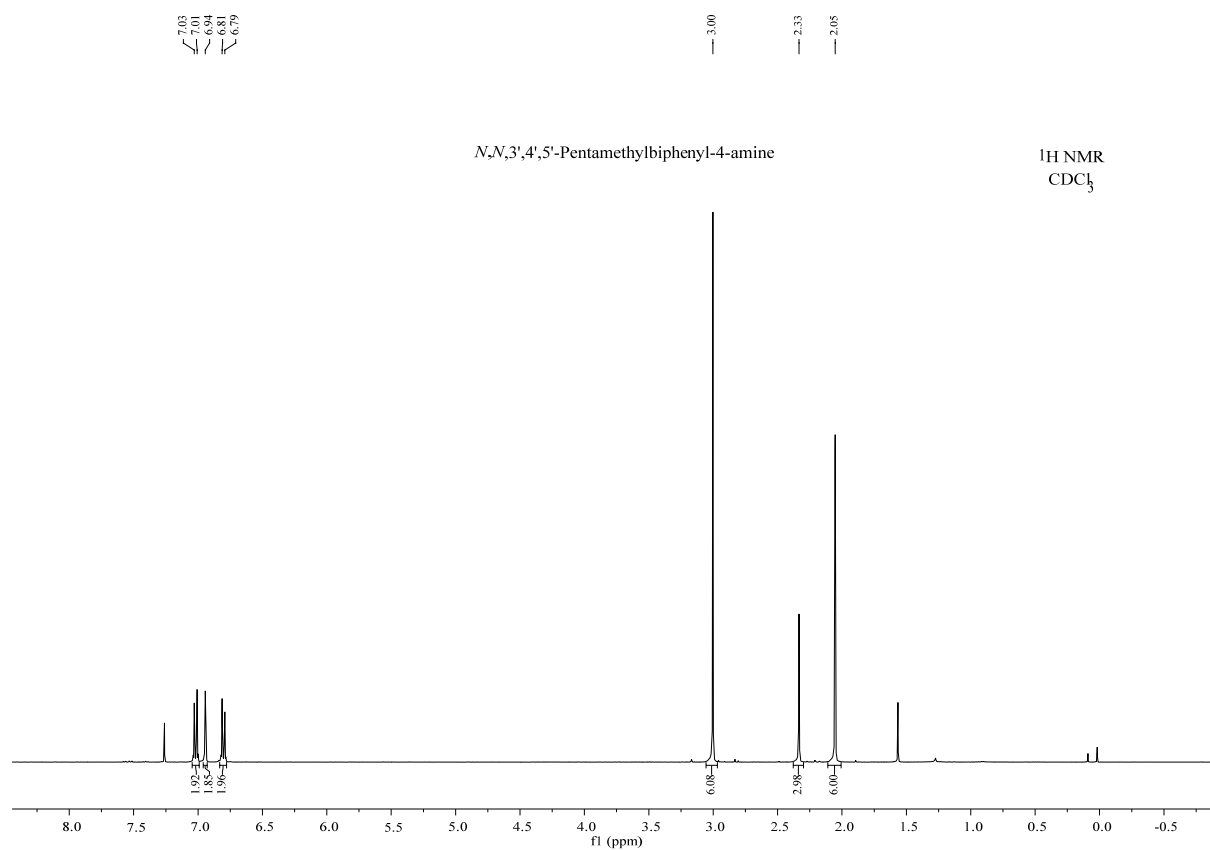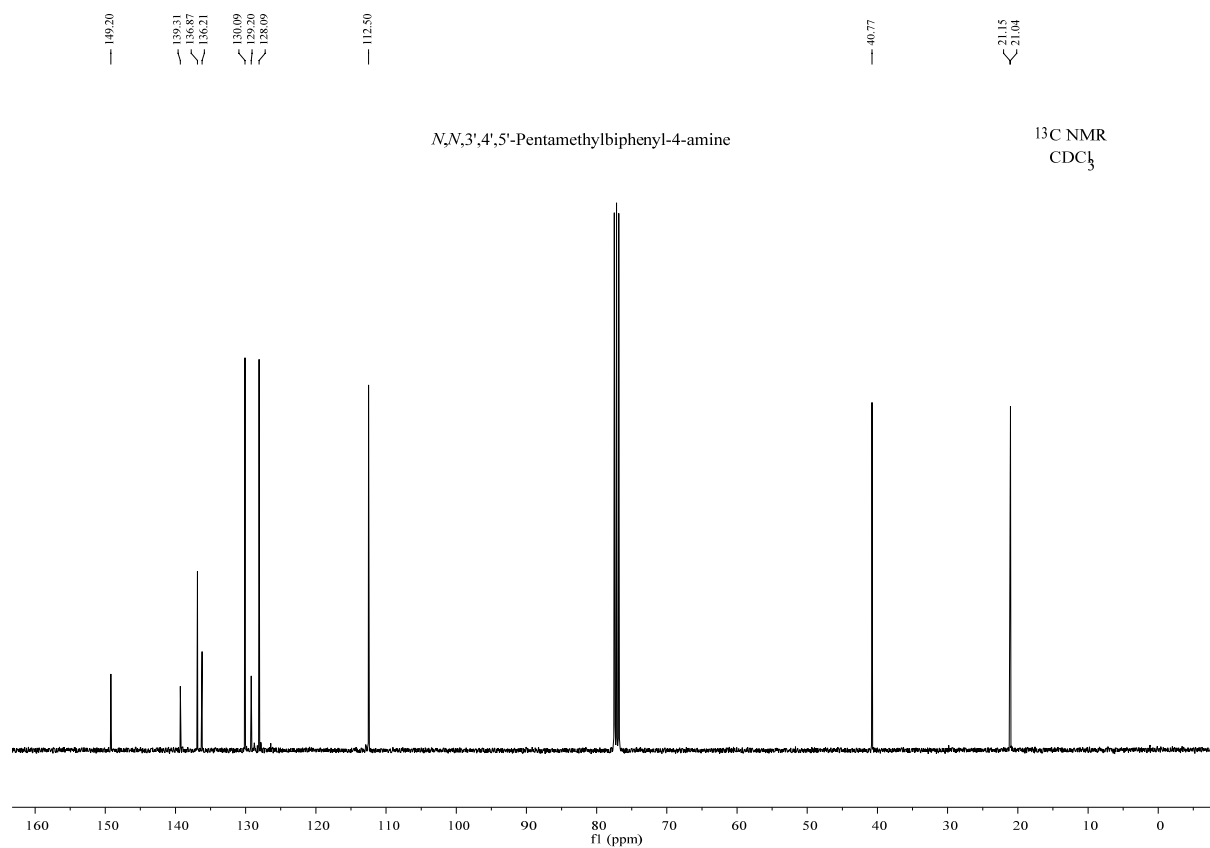

# 10. (4'-Methylbiphenyl-4-yl)(phenyl)methanone

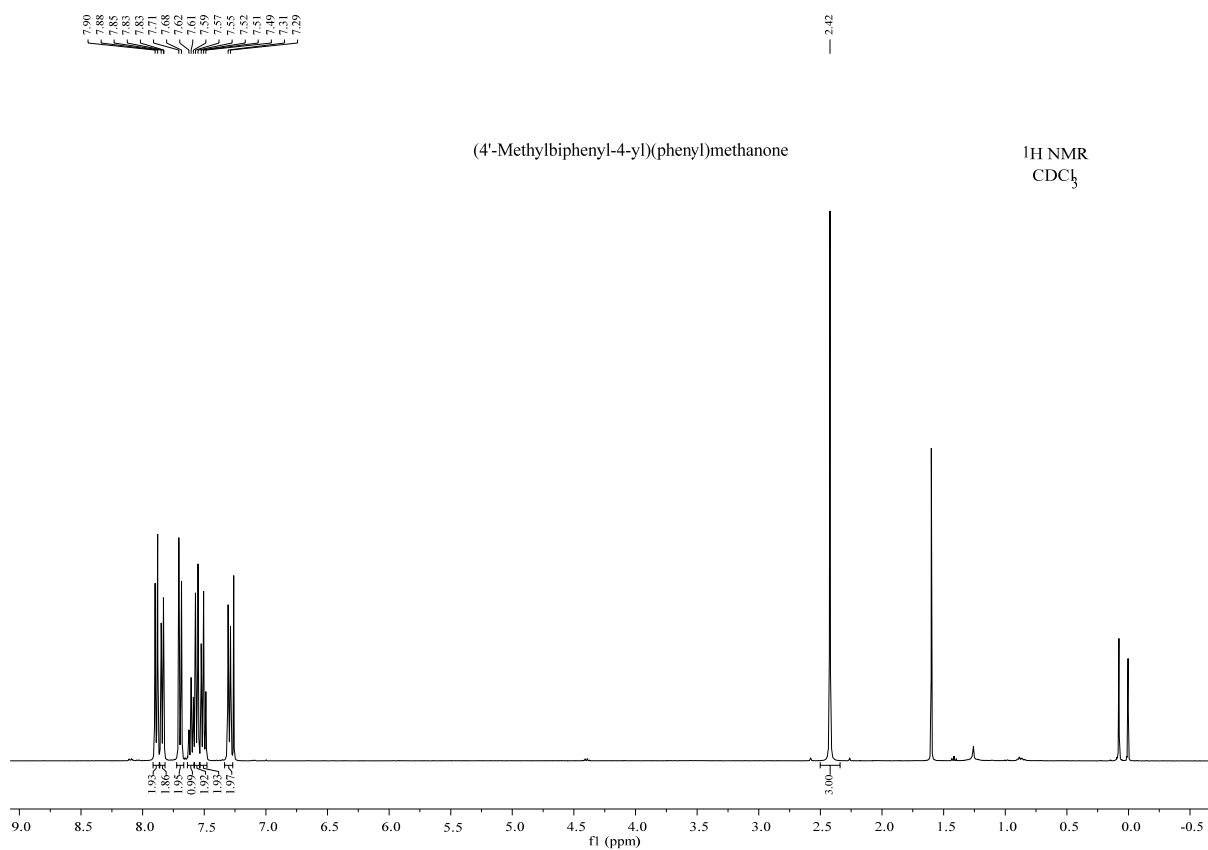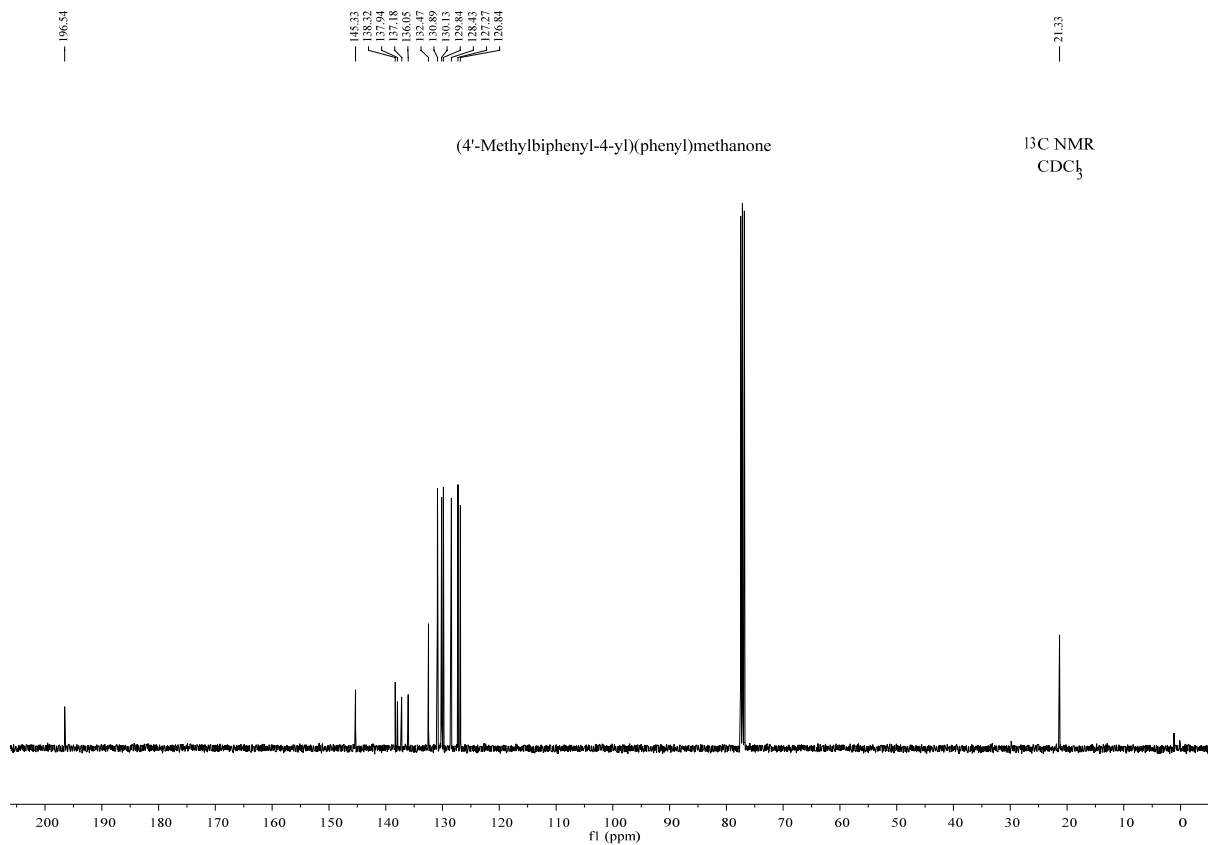

# 11. (4'-Methoxybiphenyl-4-yl)(phenyl)methanone

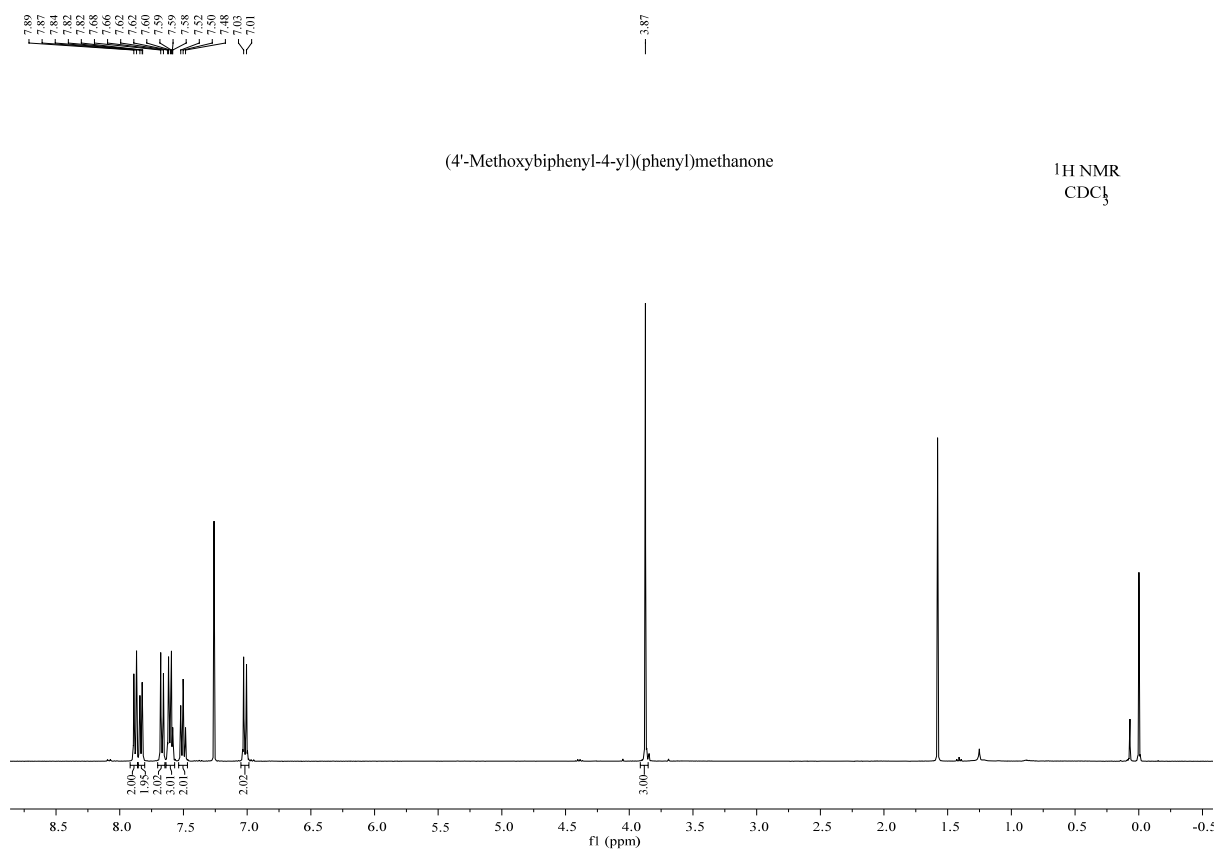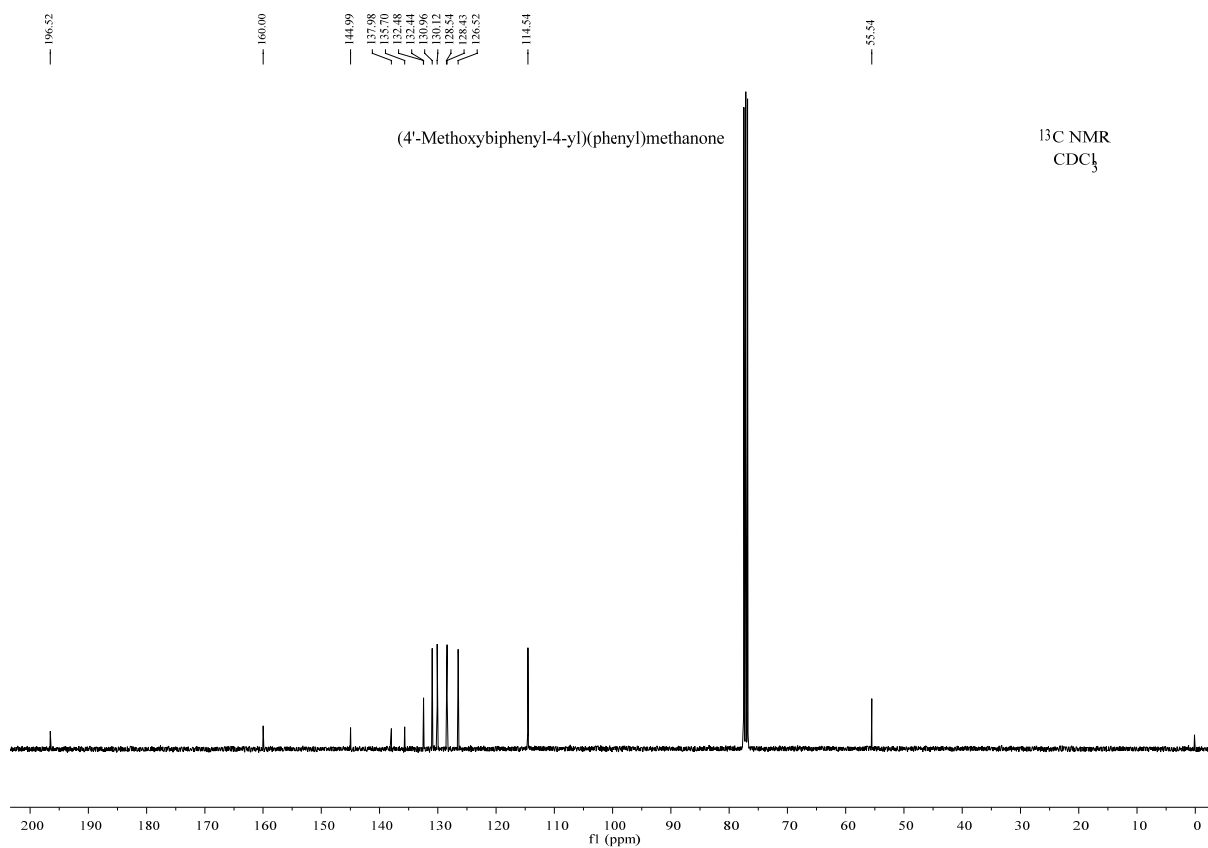

## 12. Ethyl 4'-methylbiphenyl-4-carboxylate

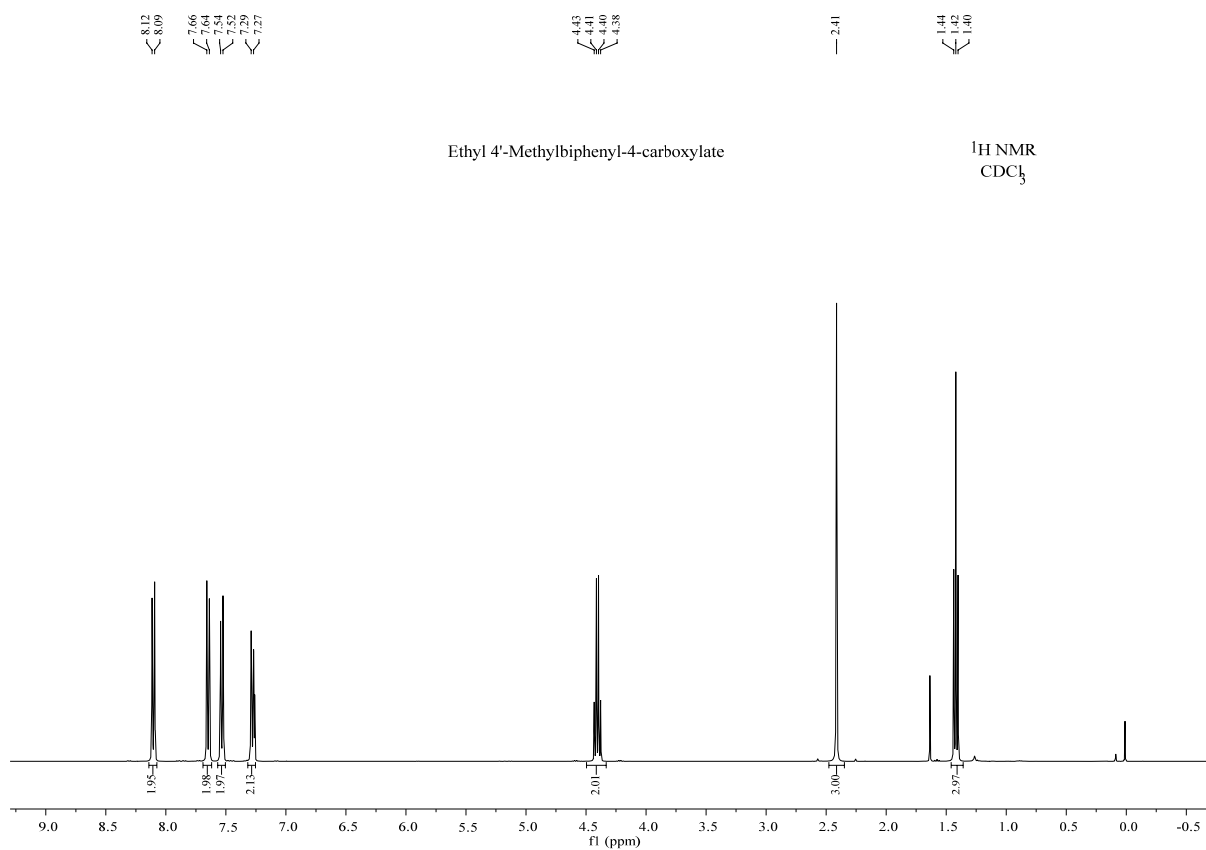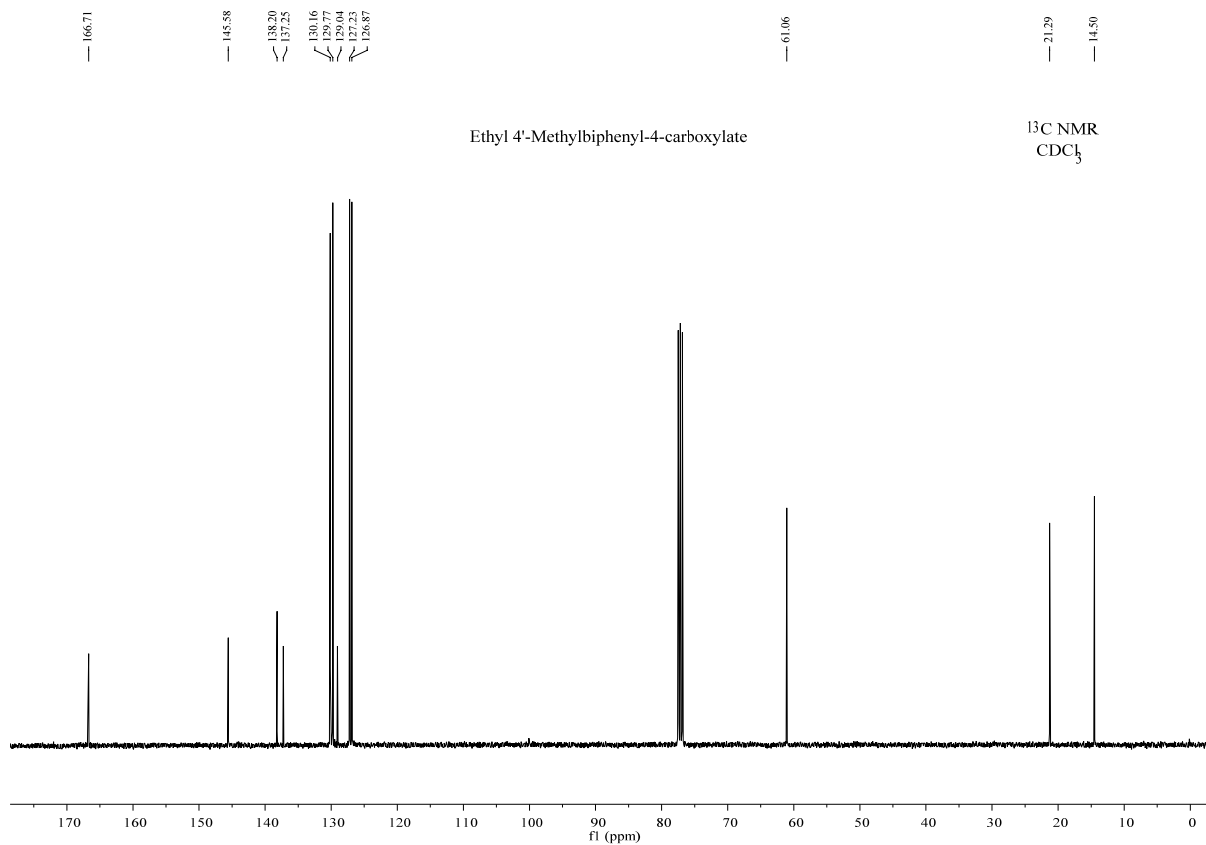

### 13. Ethyl 4'-methoxybiphenyl-4-carboxylate

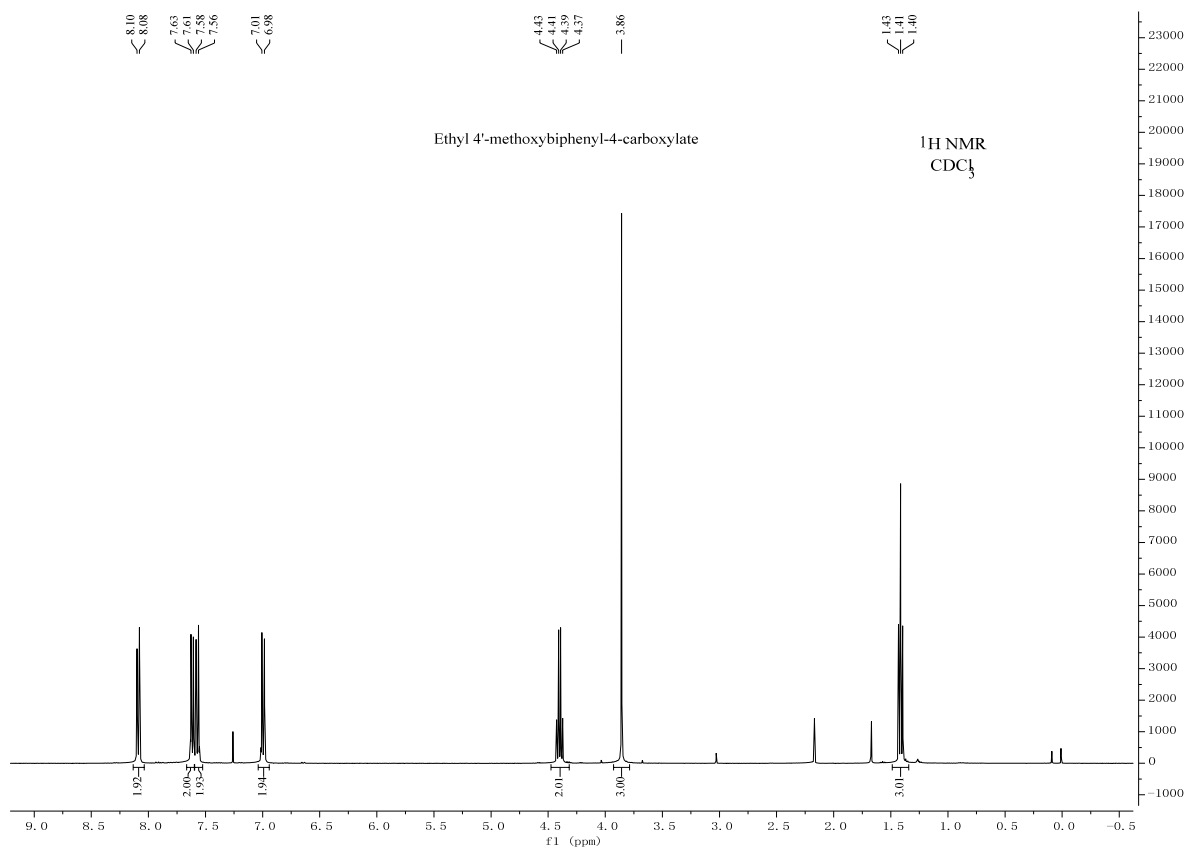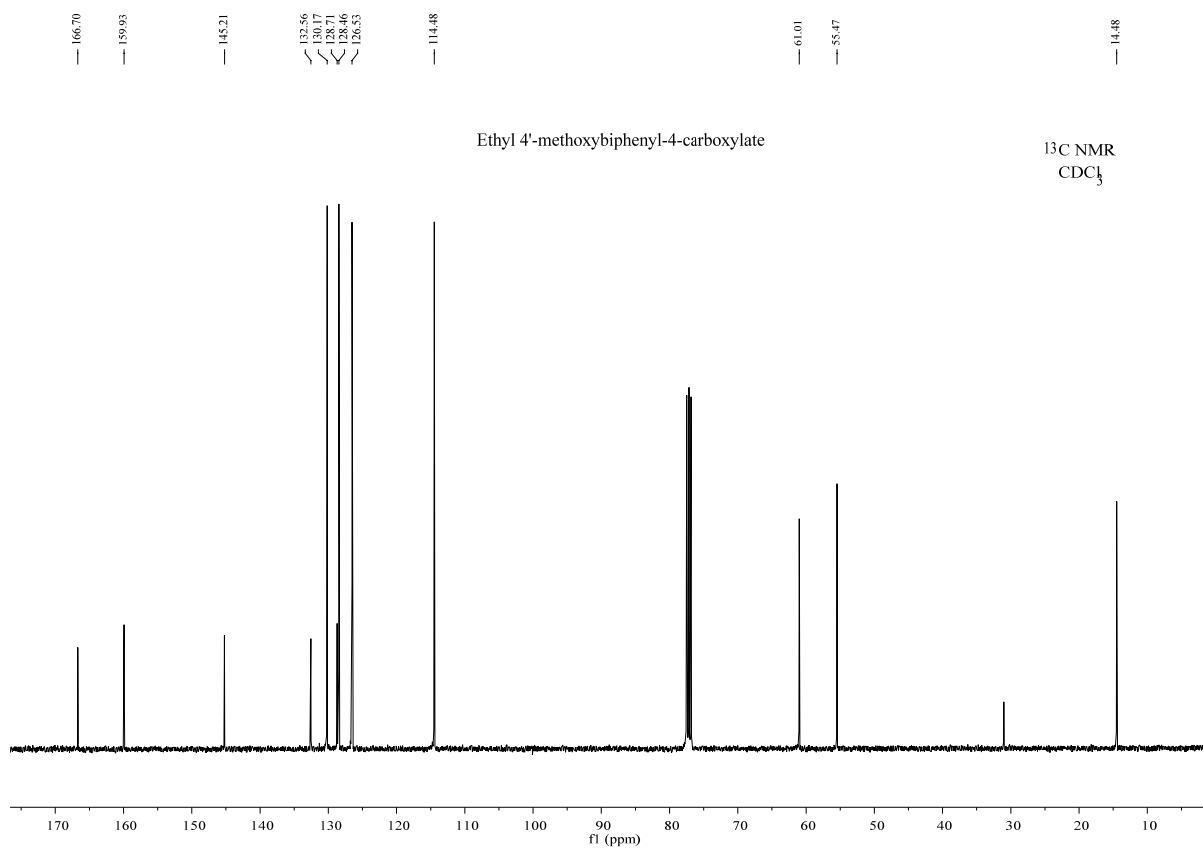

# 14. Ethyl 4'-(*N,N*-dimethoxybiphenyl)-4-carboxylate

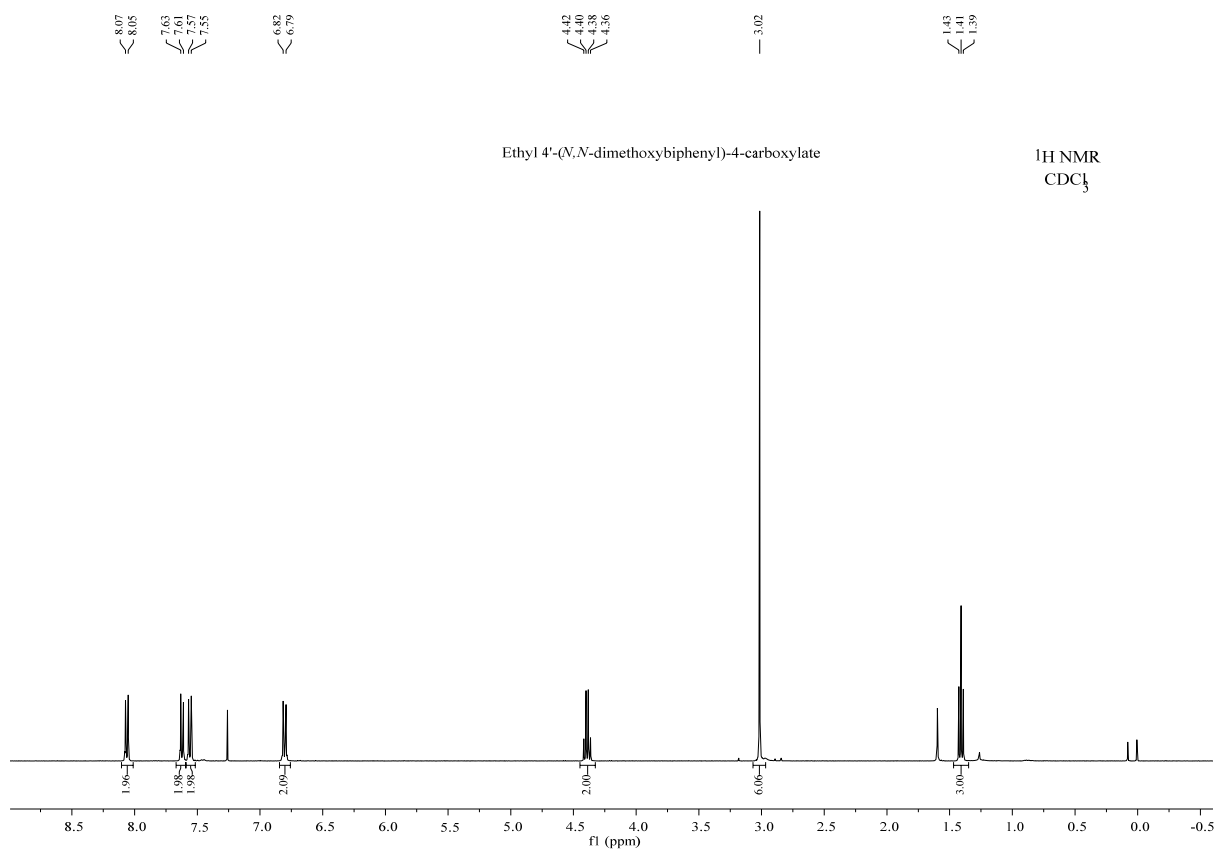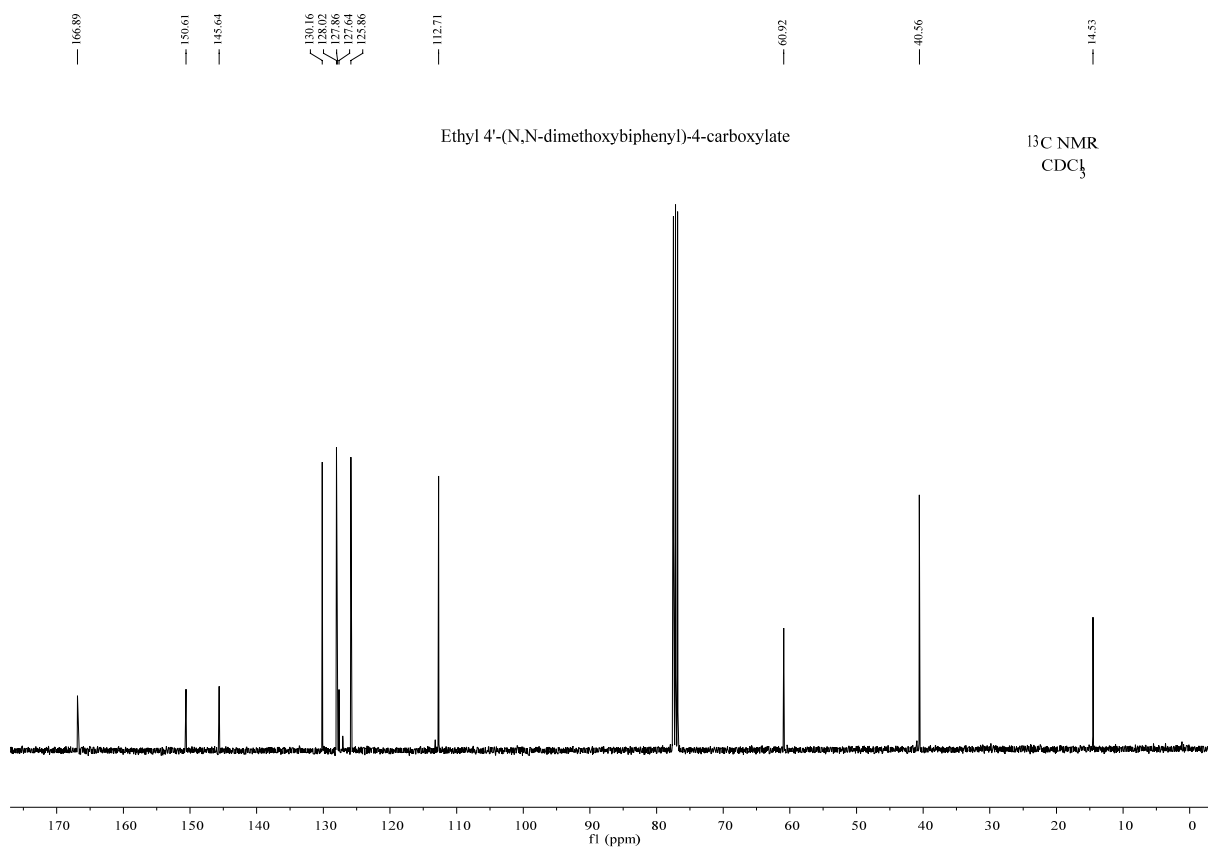



# 15. *N,N*-diethyl-4'-methylbiphenyl-4-carboxamide

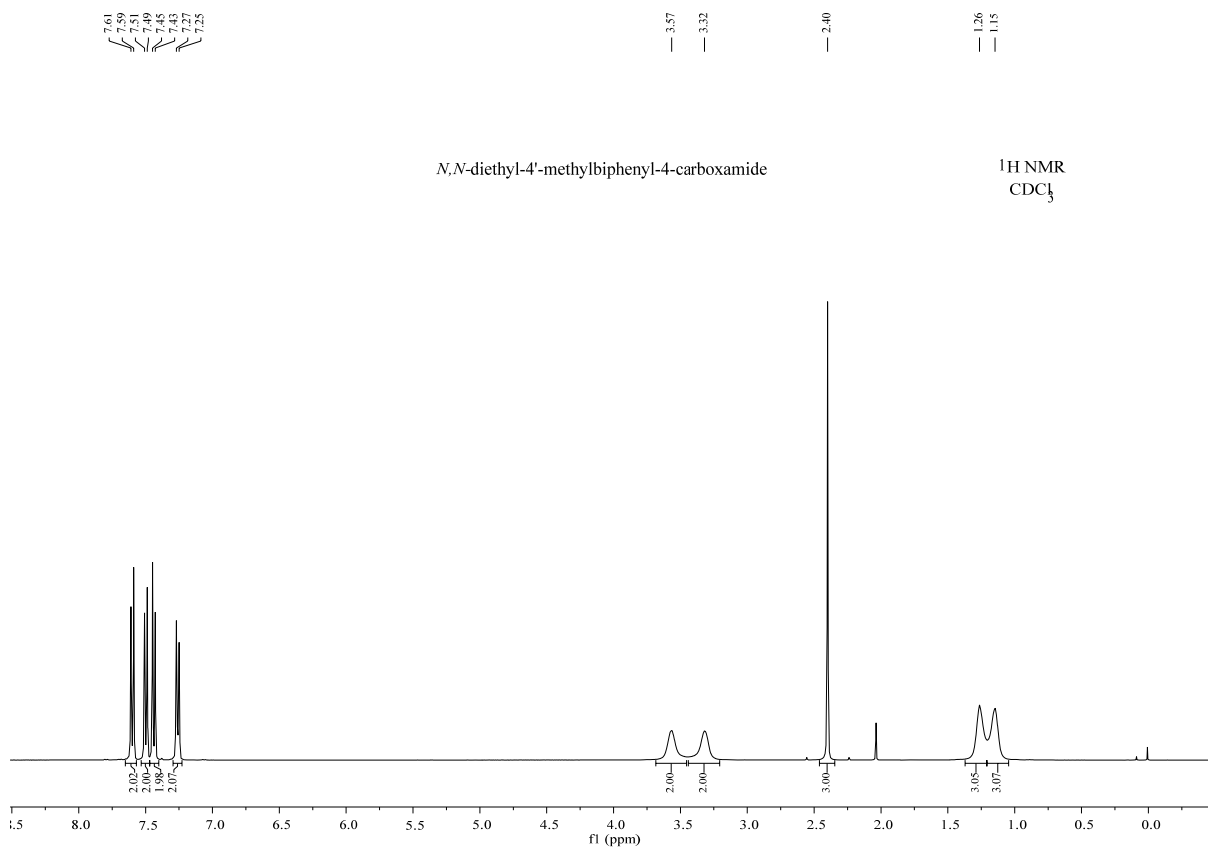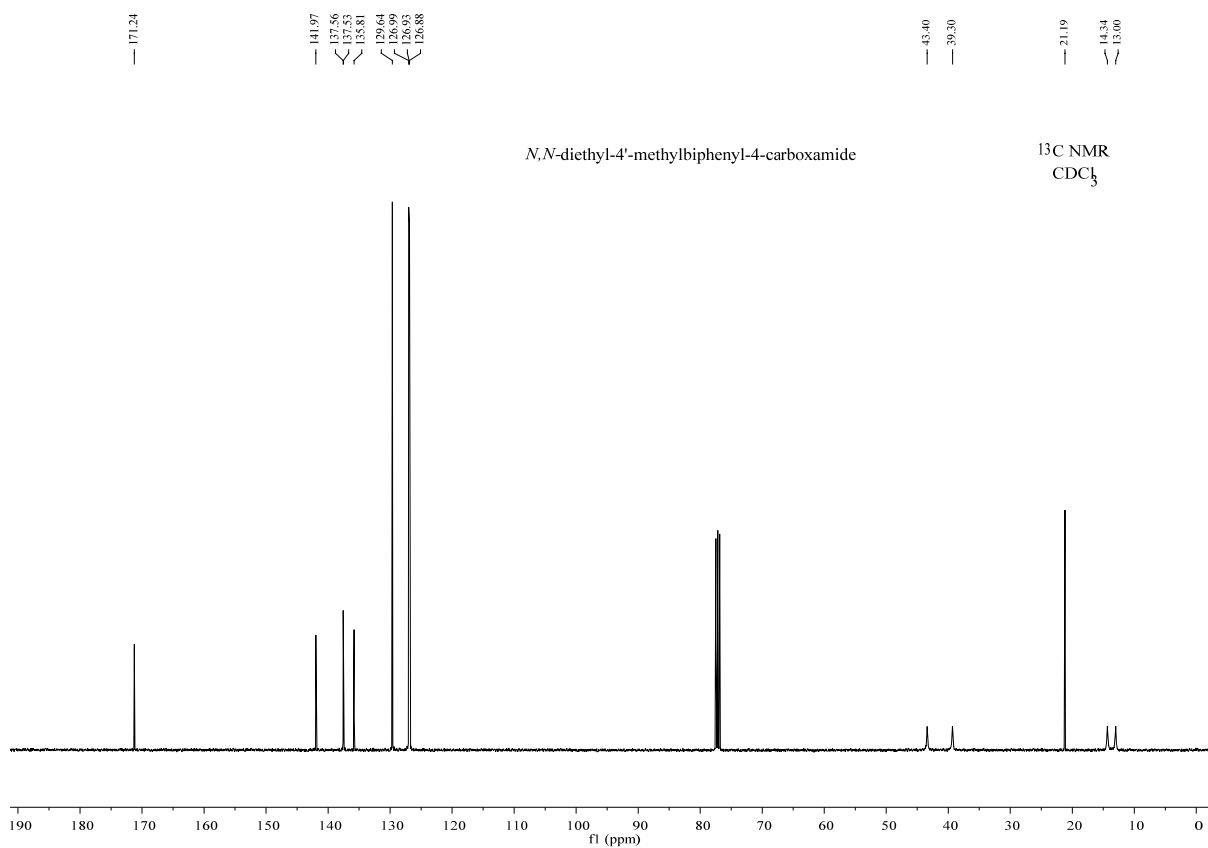

# 16. *N,N*-Diethyl-4'-Methoxybiphenyl-4-carboxamide

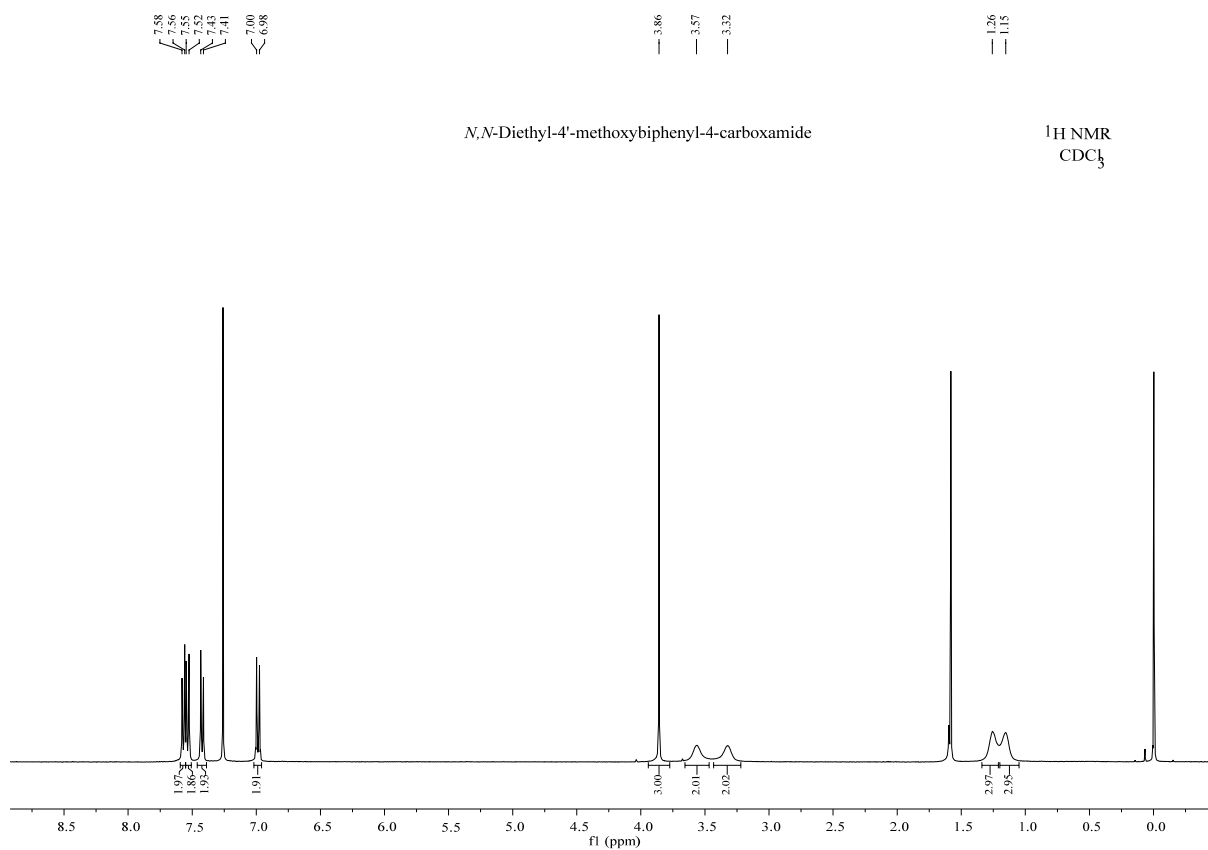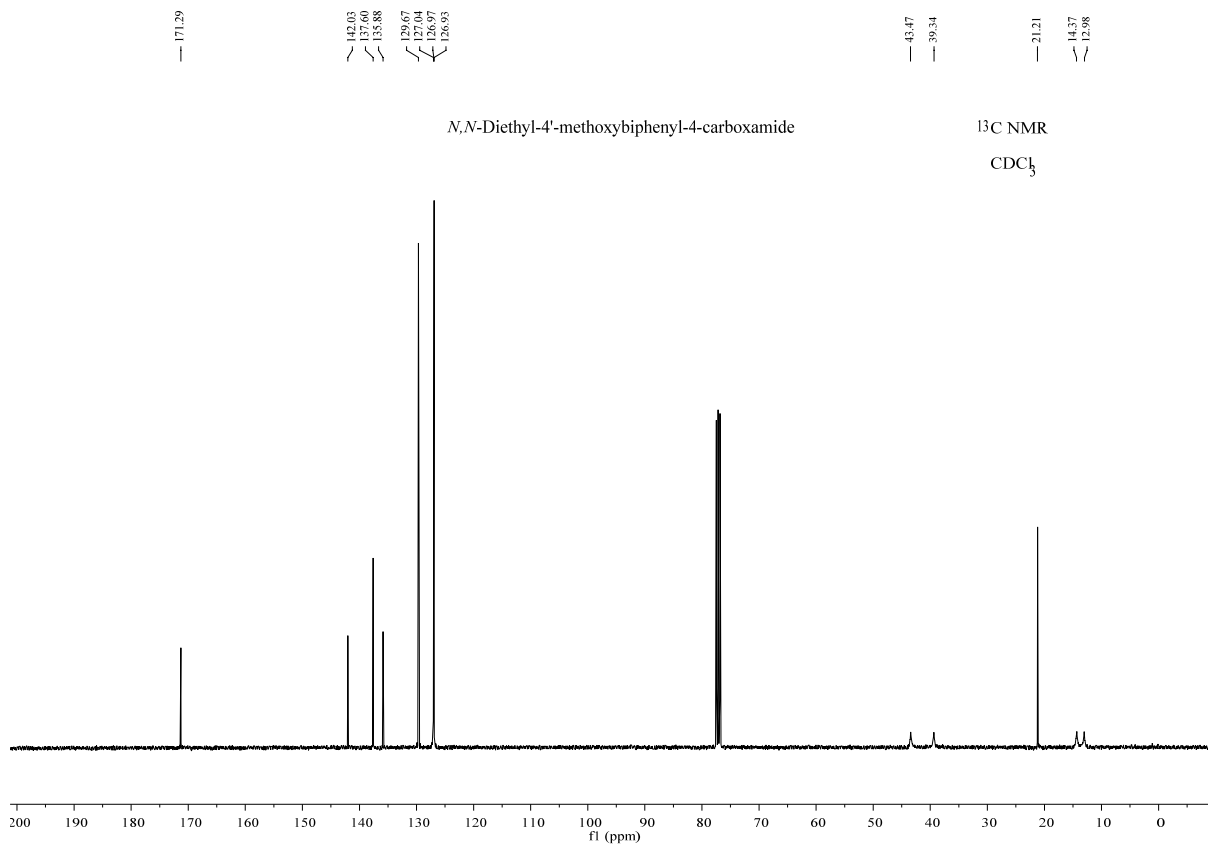

# 17. 4'-Methyl-4-(trifluoromethyl)biphenyl

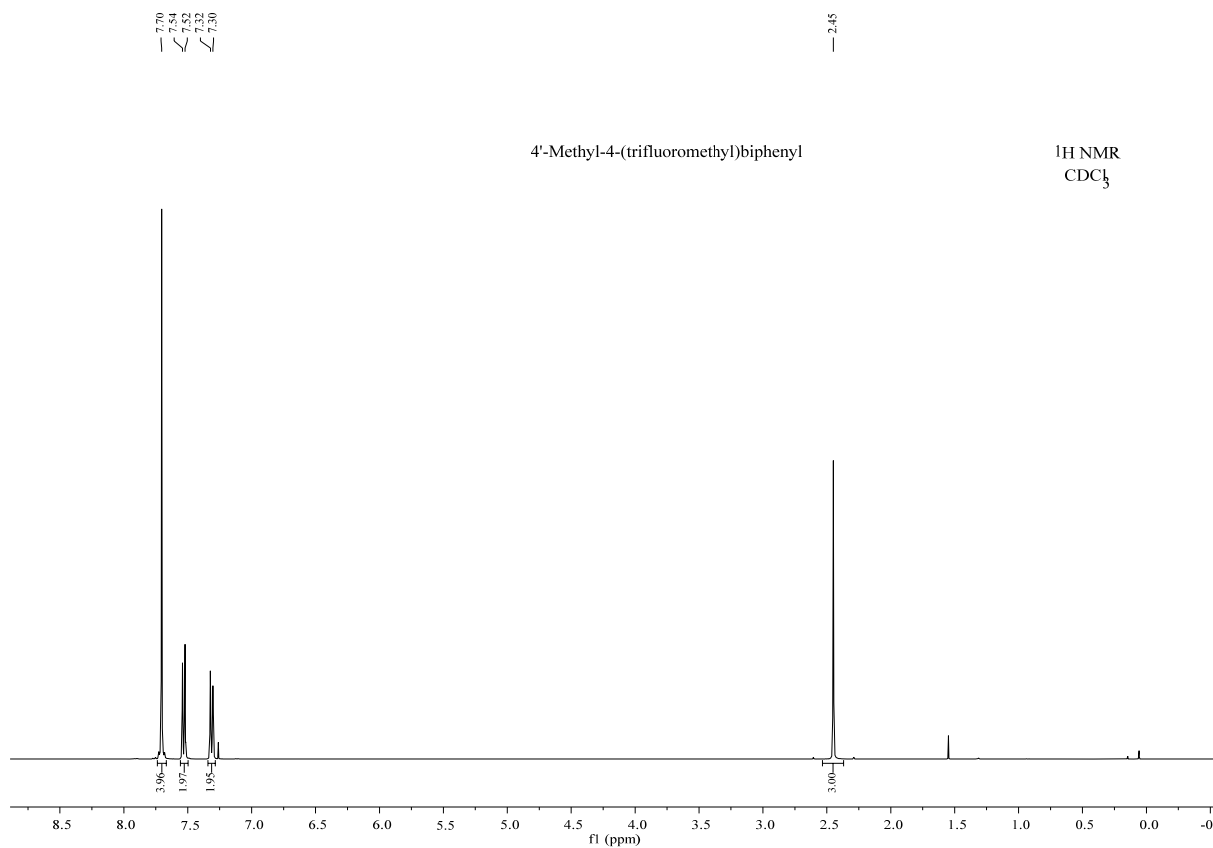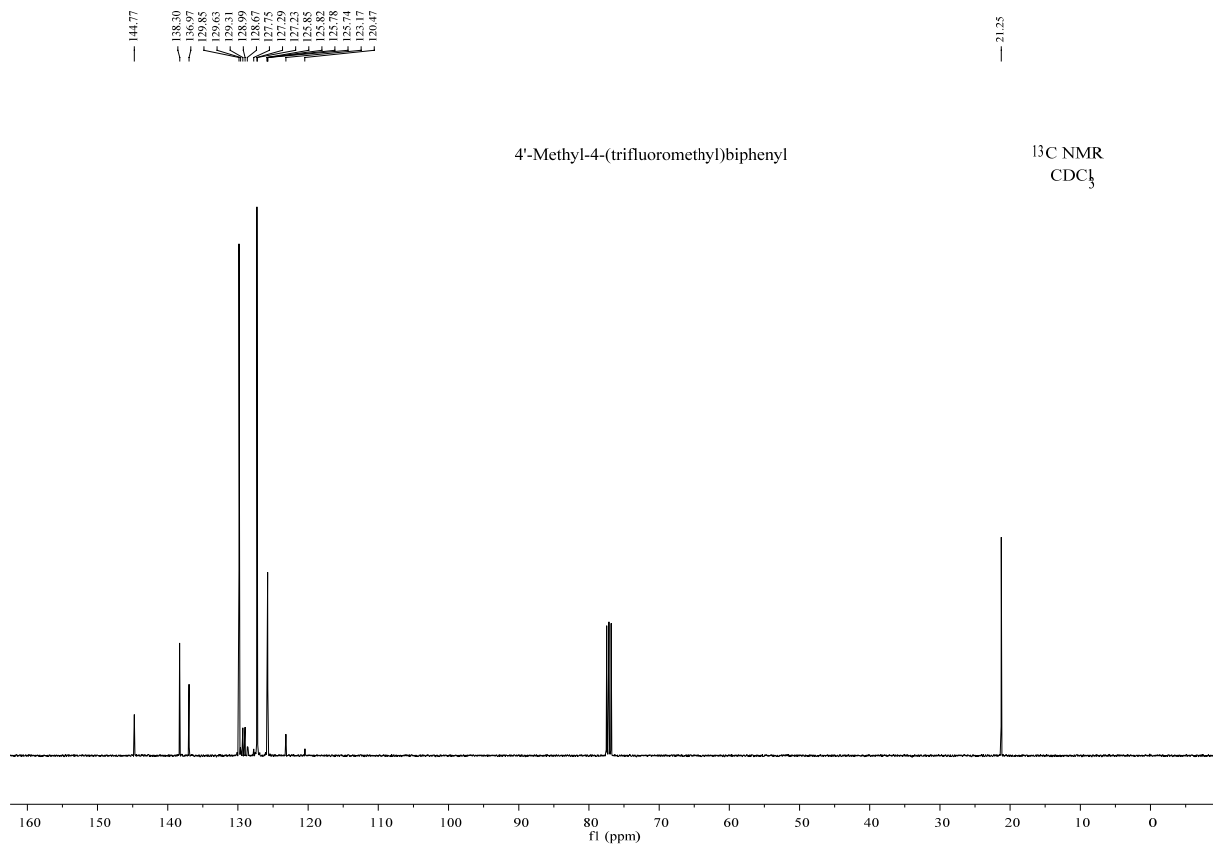

# 18. 4'-Methoxy-4-(trifluoromethyl)biphenyl

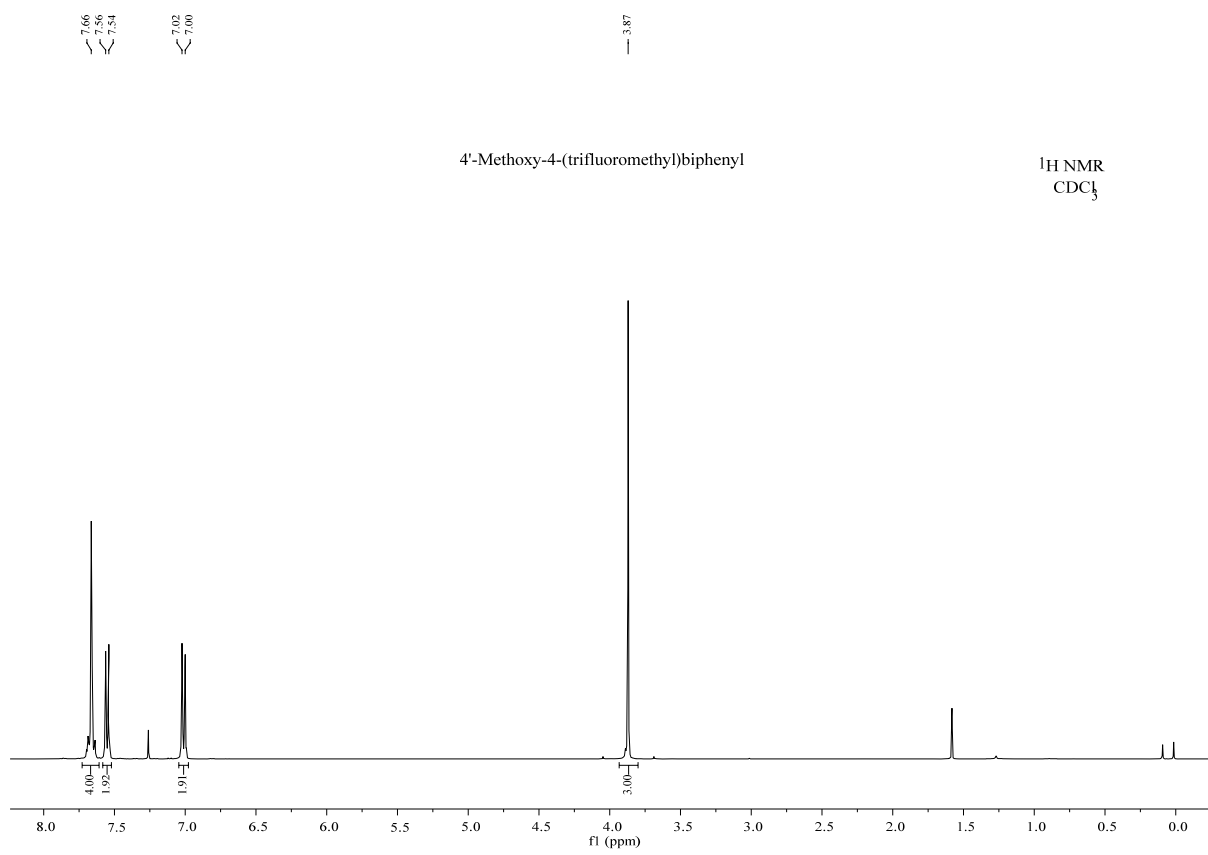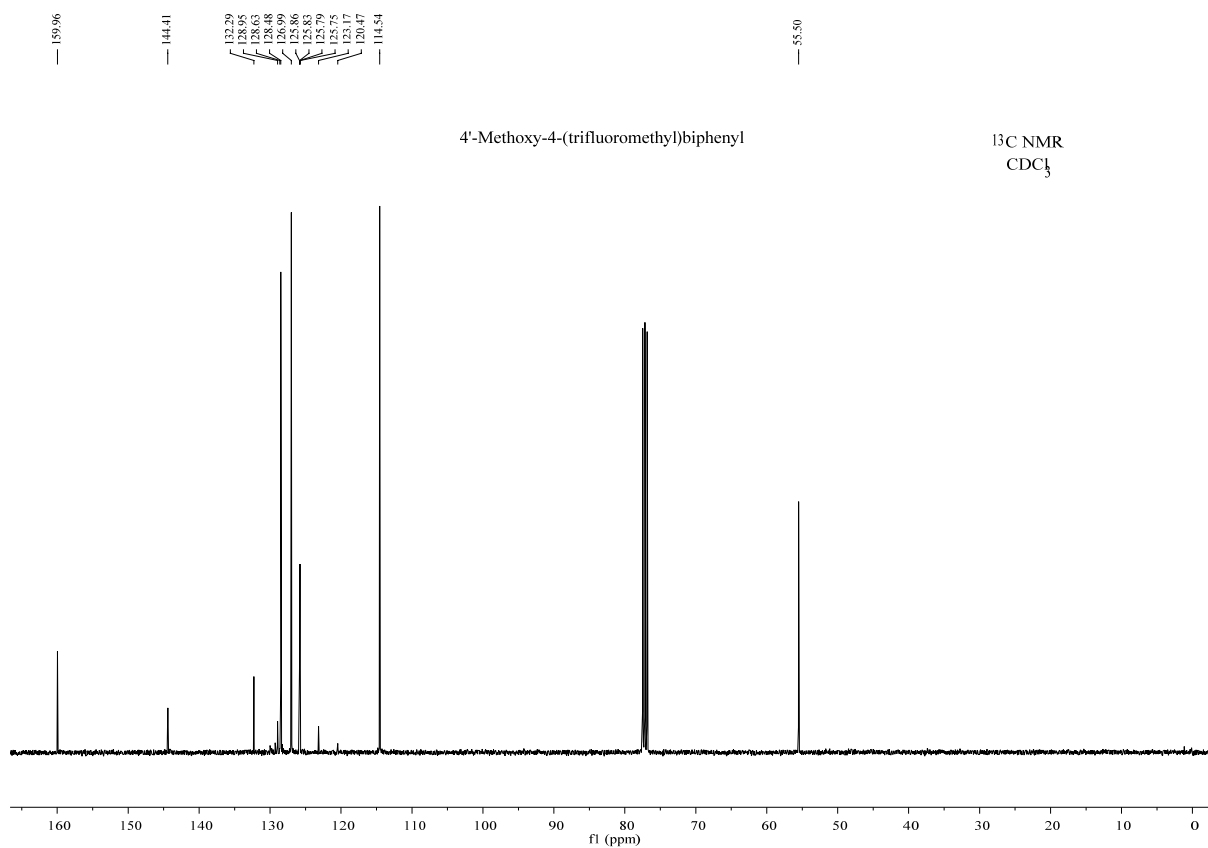

# 19. 4-Ethanesulfonyl-4'-methyl-biphenyl

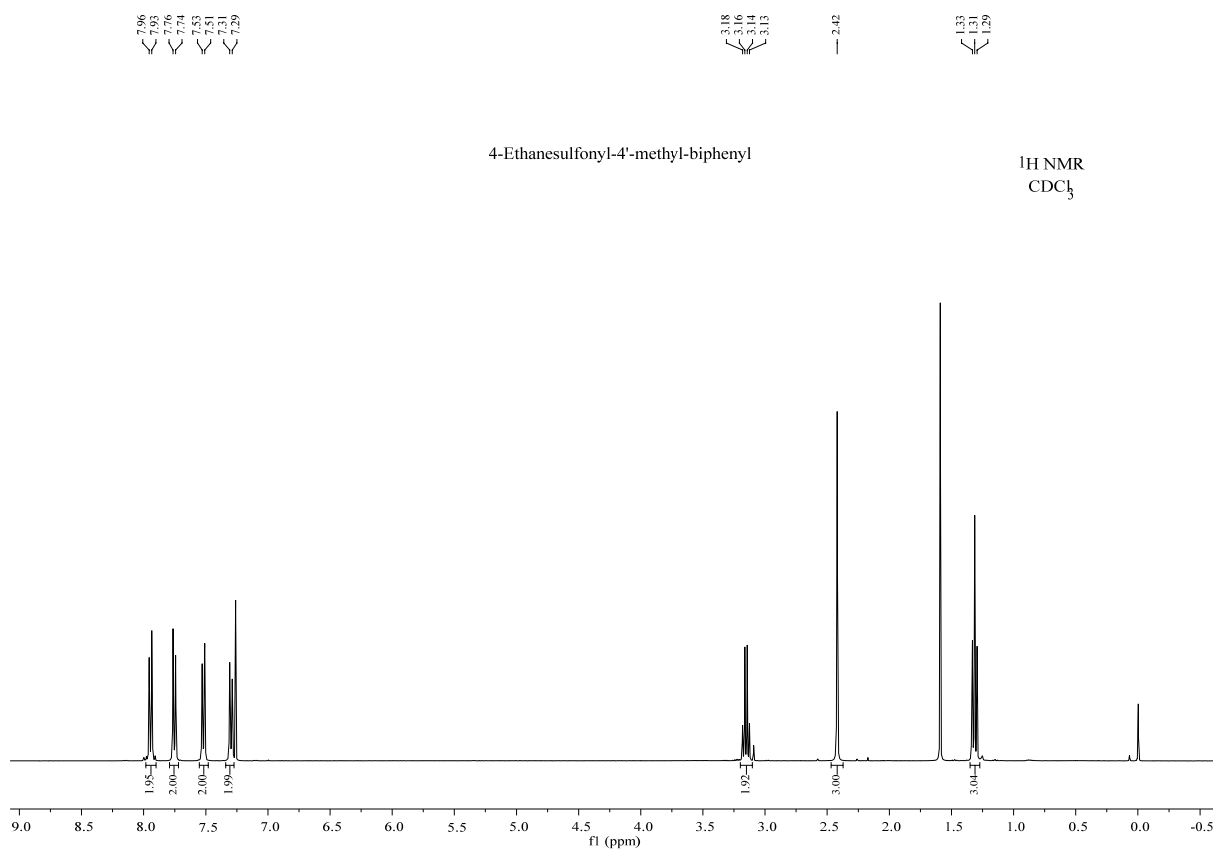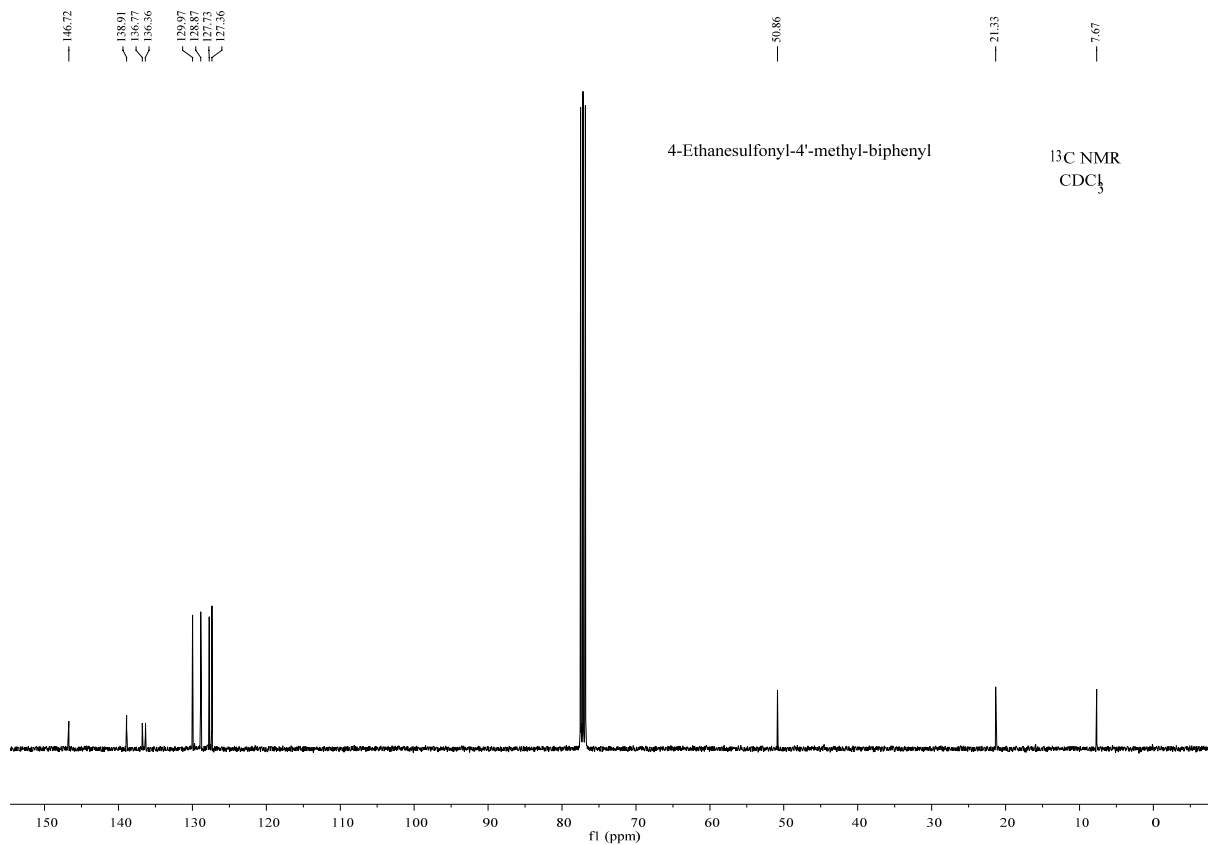

## 20. 4-Ethanesulfonyl-4'-methoxy-biphenyl

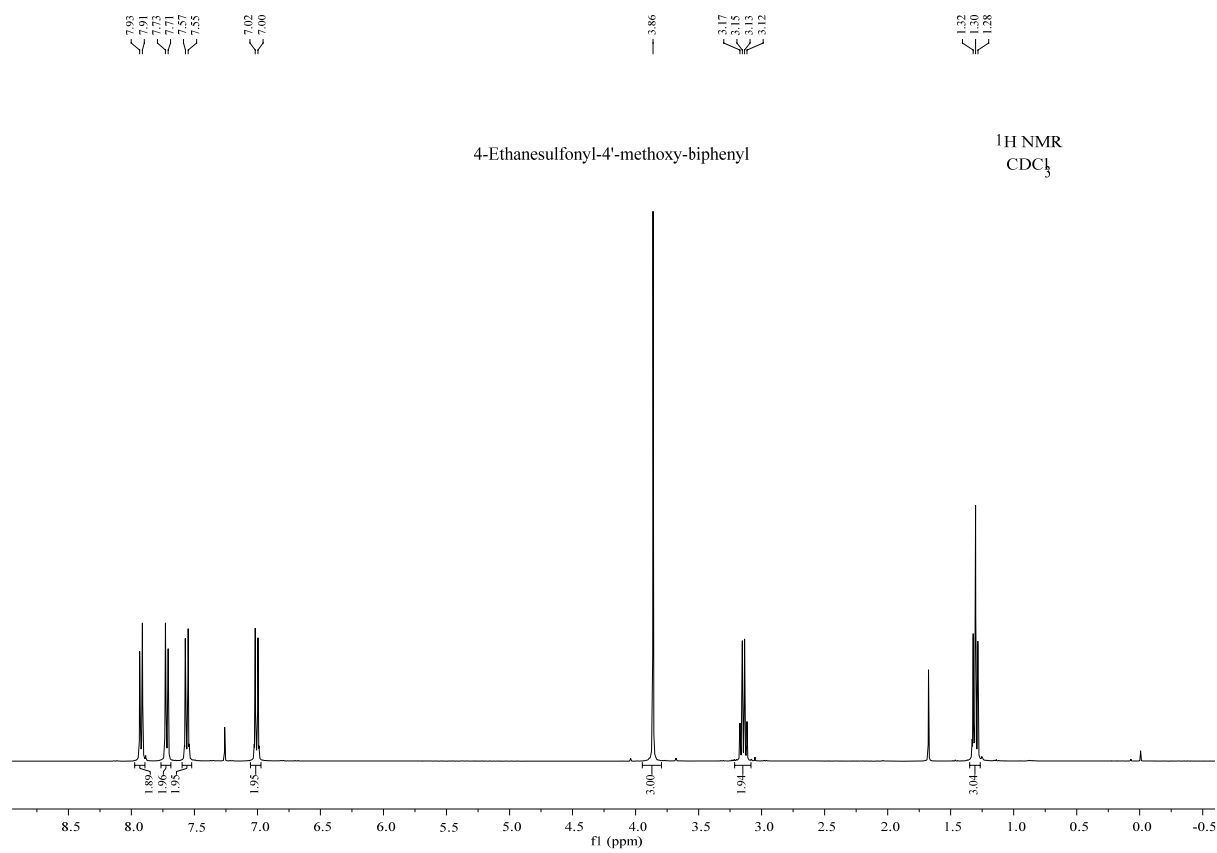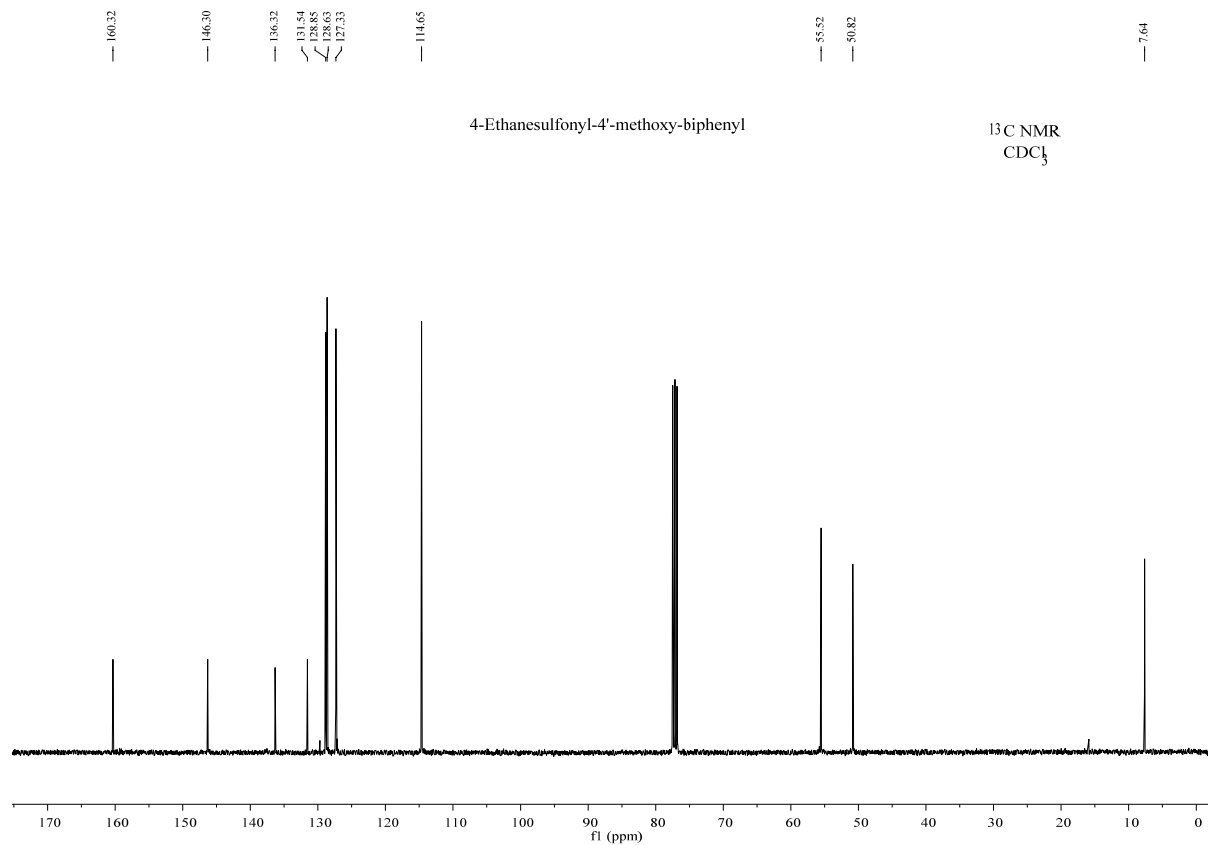

# 21. (2'-Methylbiphenyl-4-yl)(phenyl)methanone

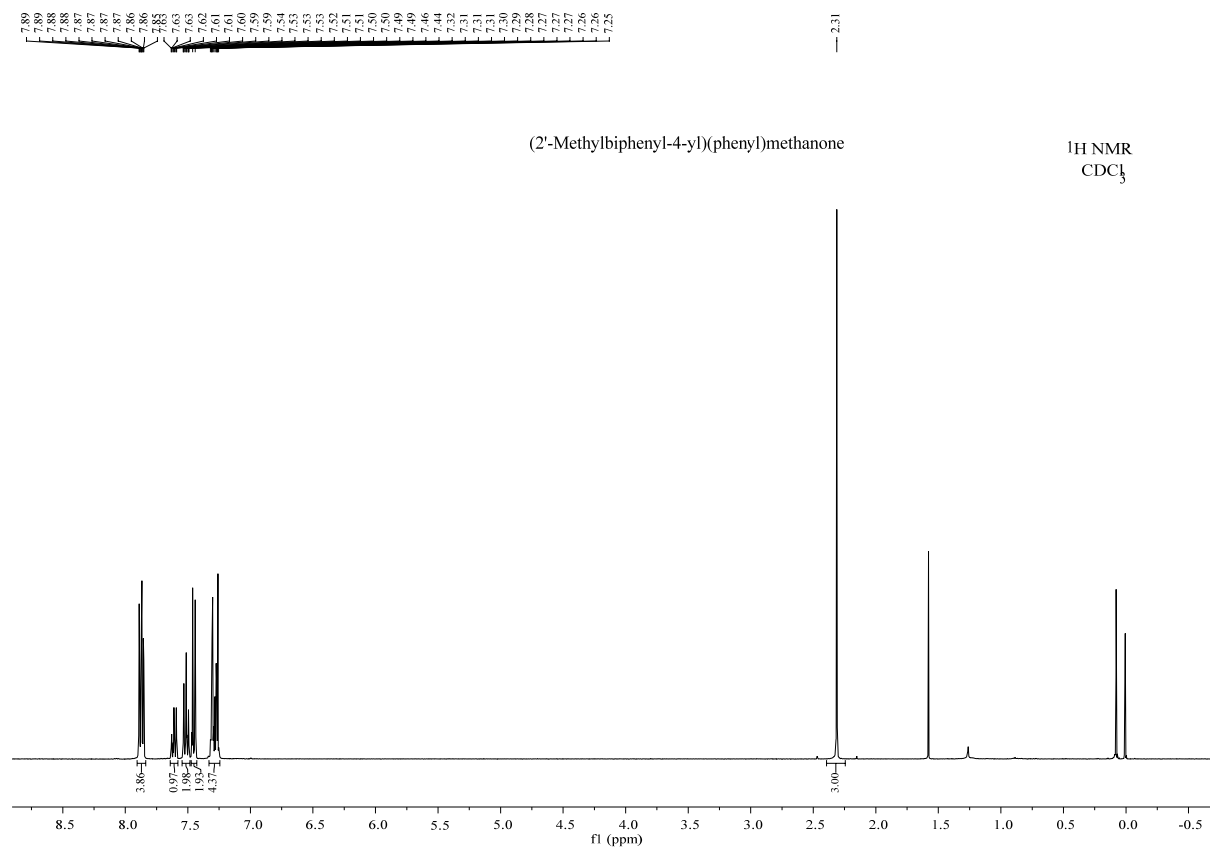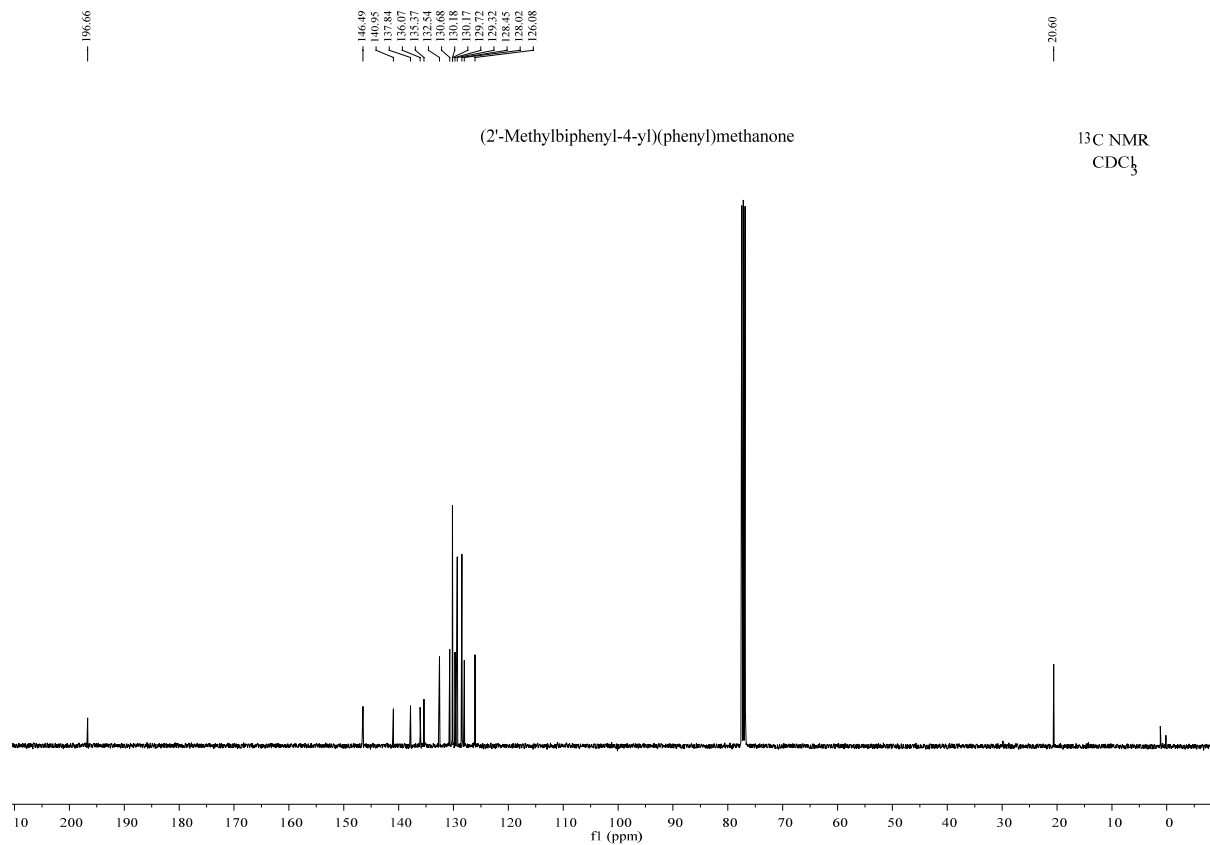

## 22. Ethyl 2'-methylbiphenyl-4-carboxylate

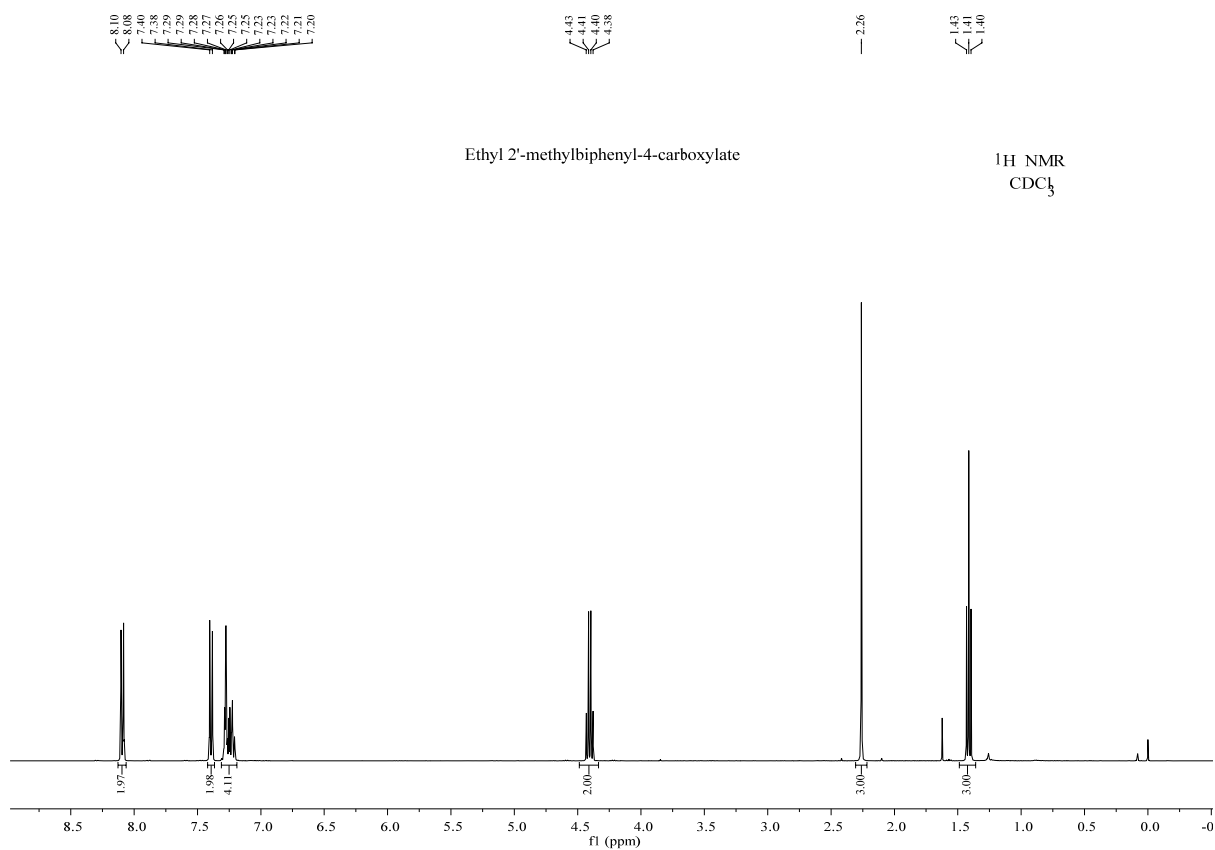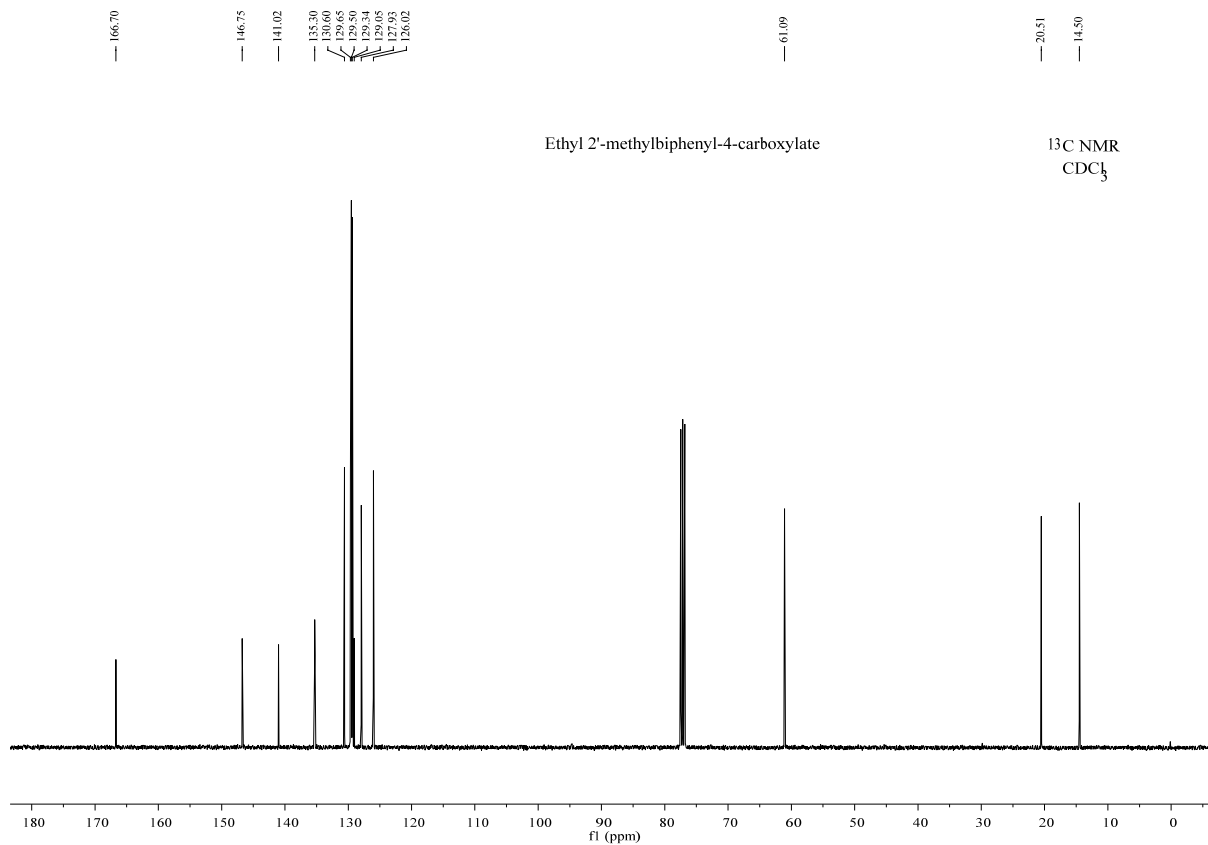



### 23. Phenyl(4'-(trifluoromethyl)biphenyl-4-yl)methanone

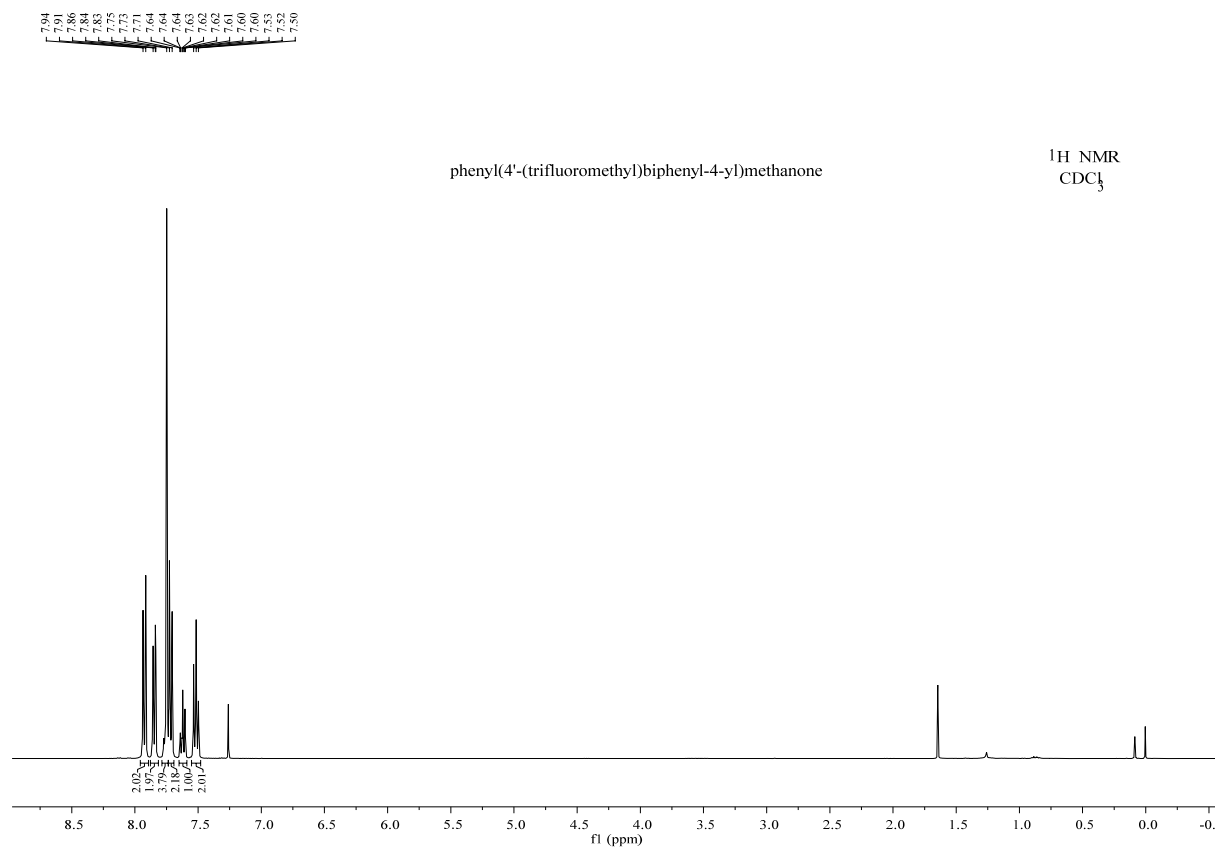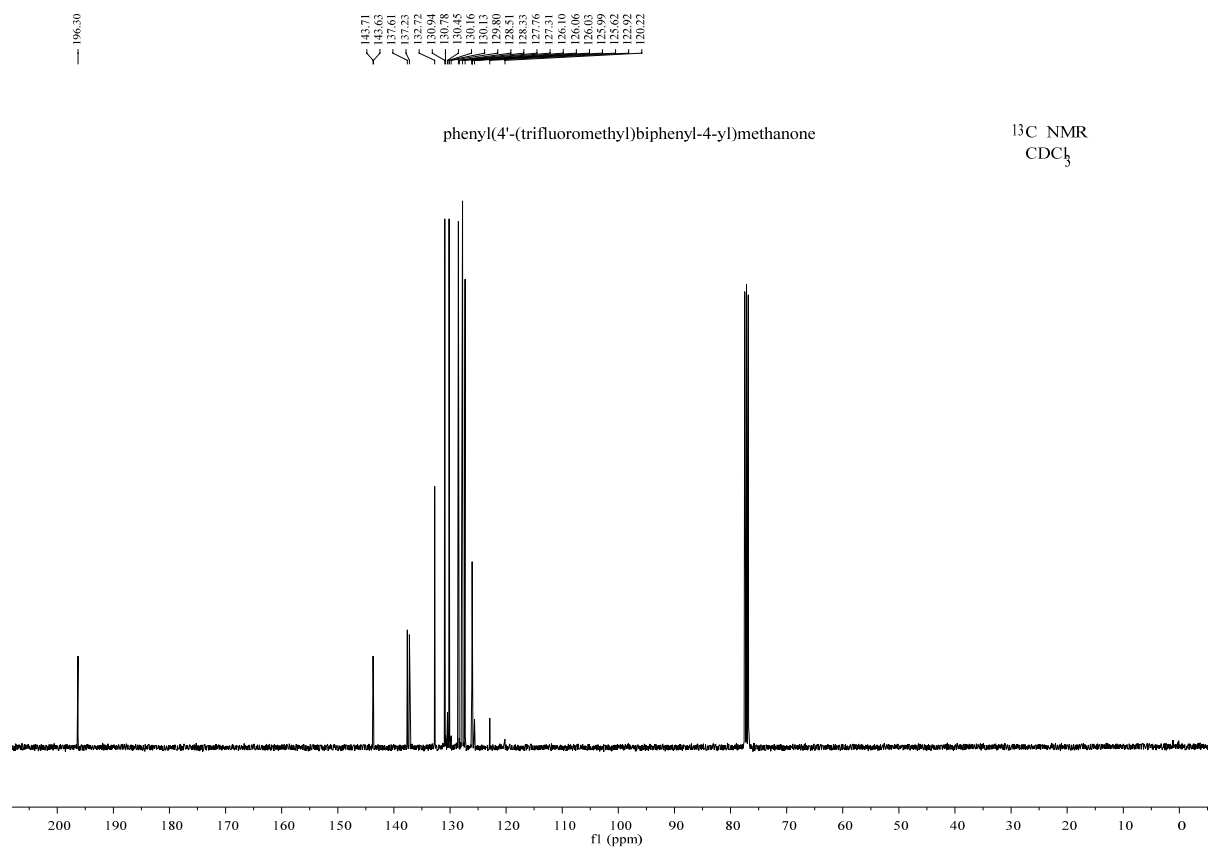

## 24. Ethyl 4'-(trifluoromethyl)biphenyl-4-carboxylate

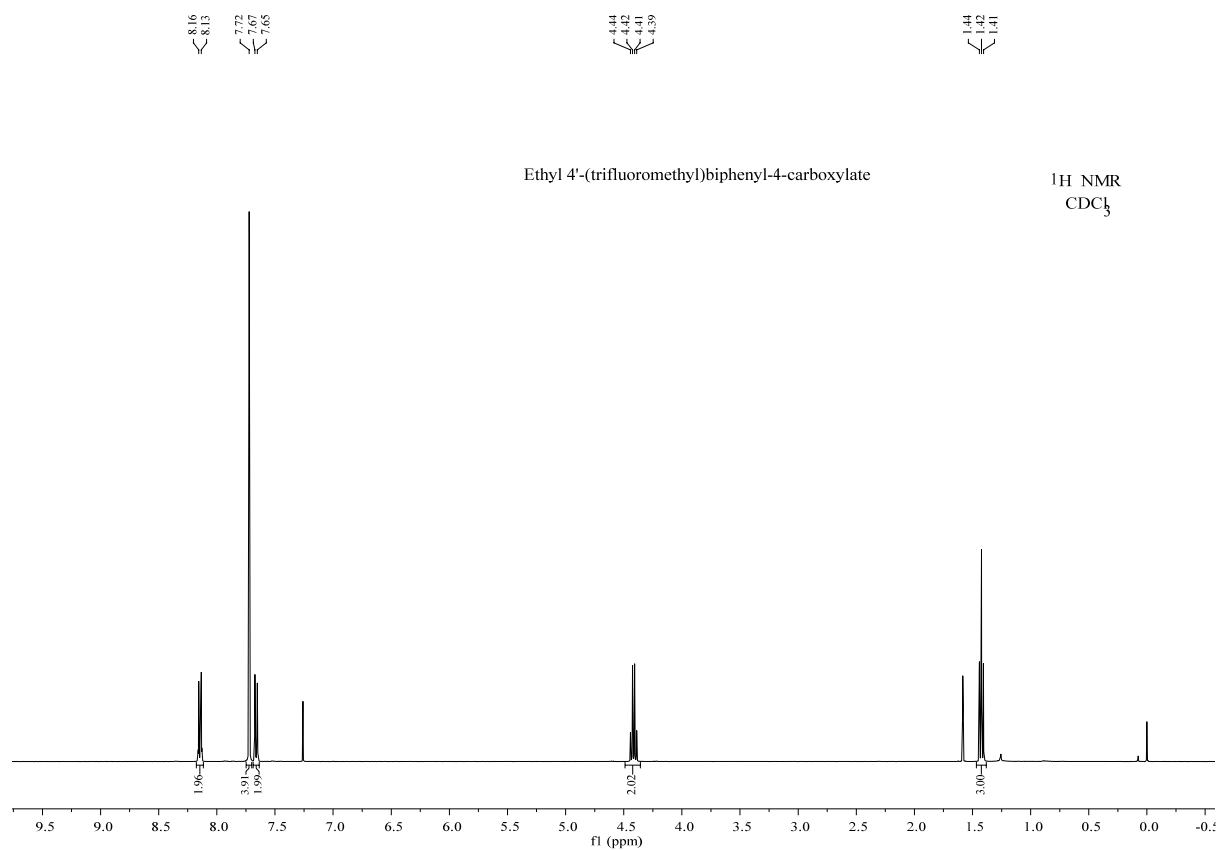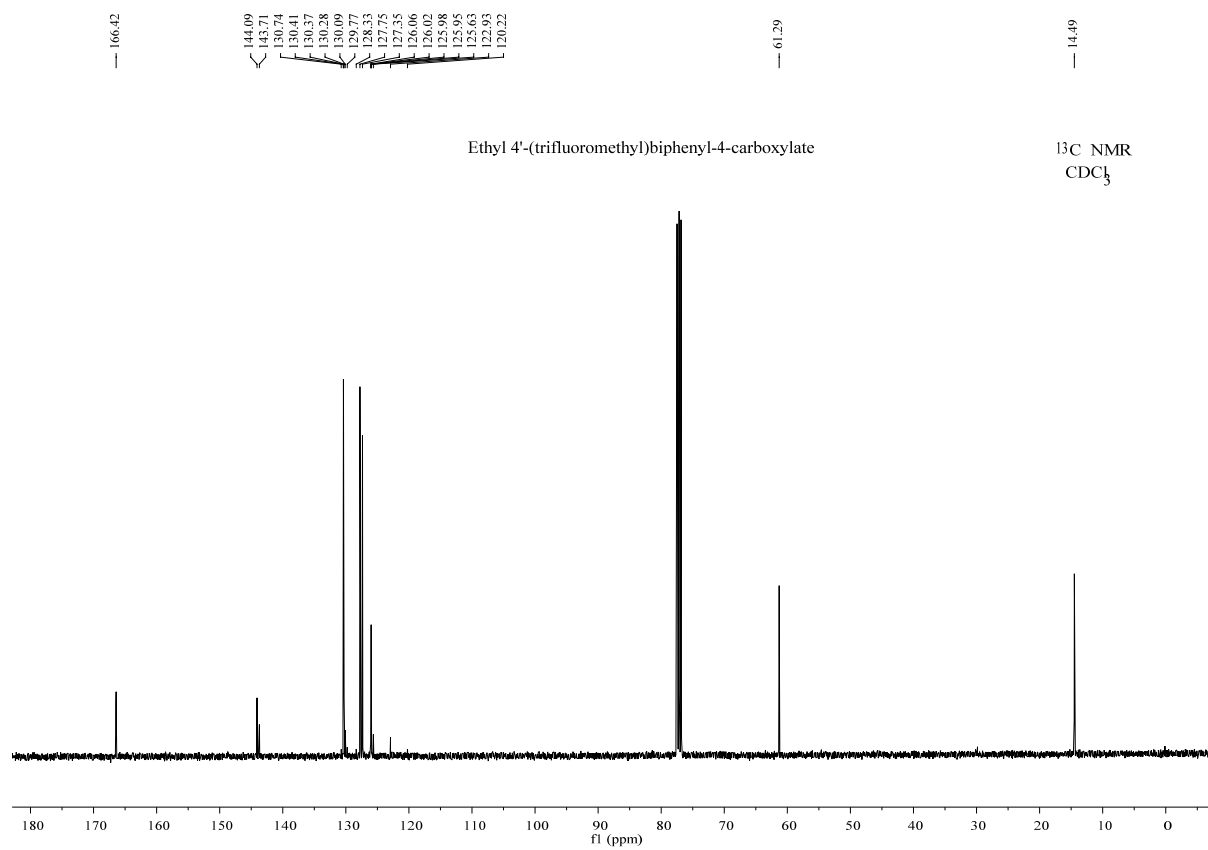

25. *N,N*-Diethyl-4'-(trifluoromethyl)biphenyl-4-carboxamide

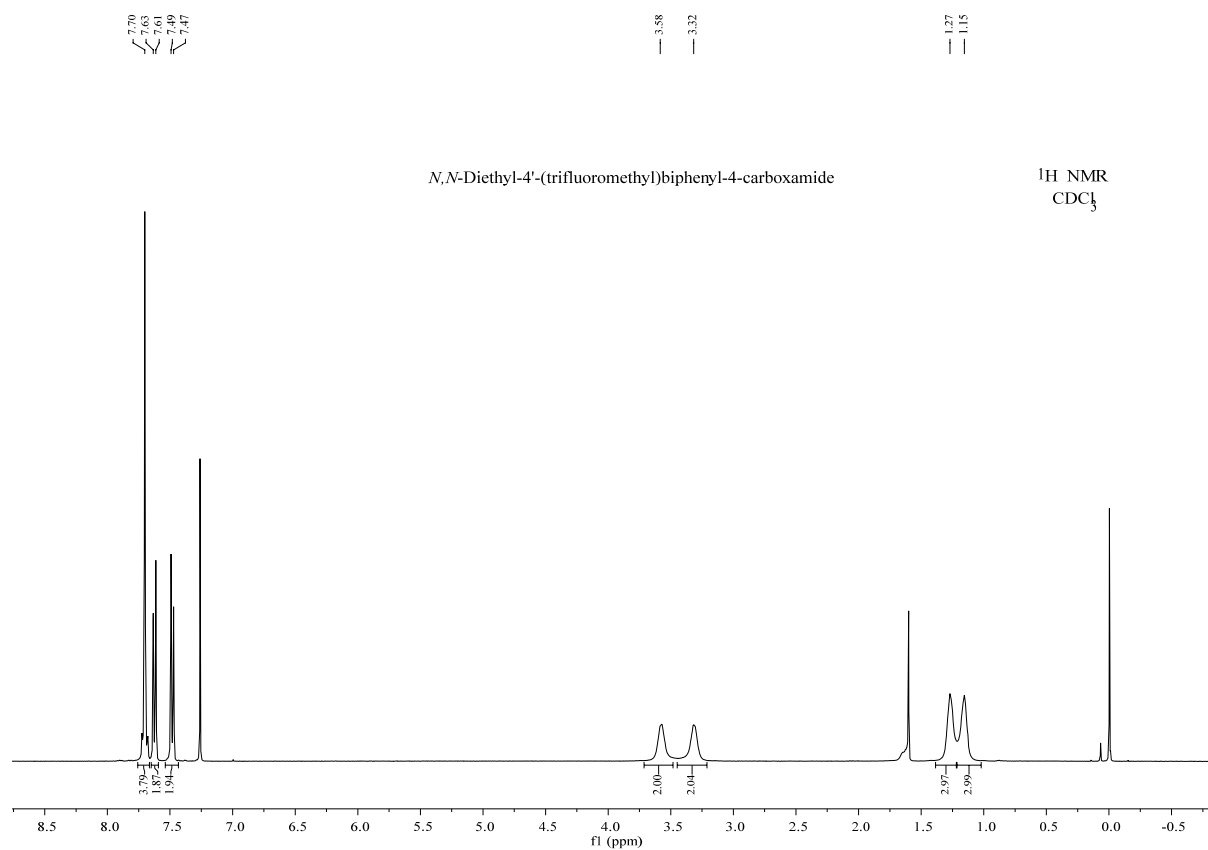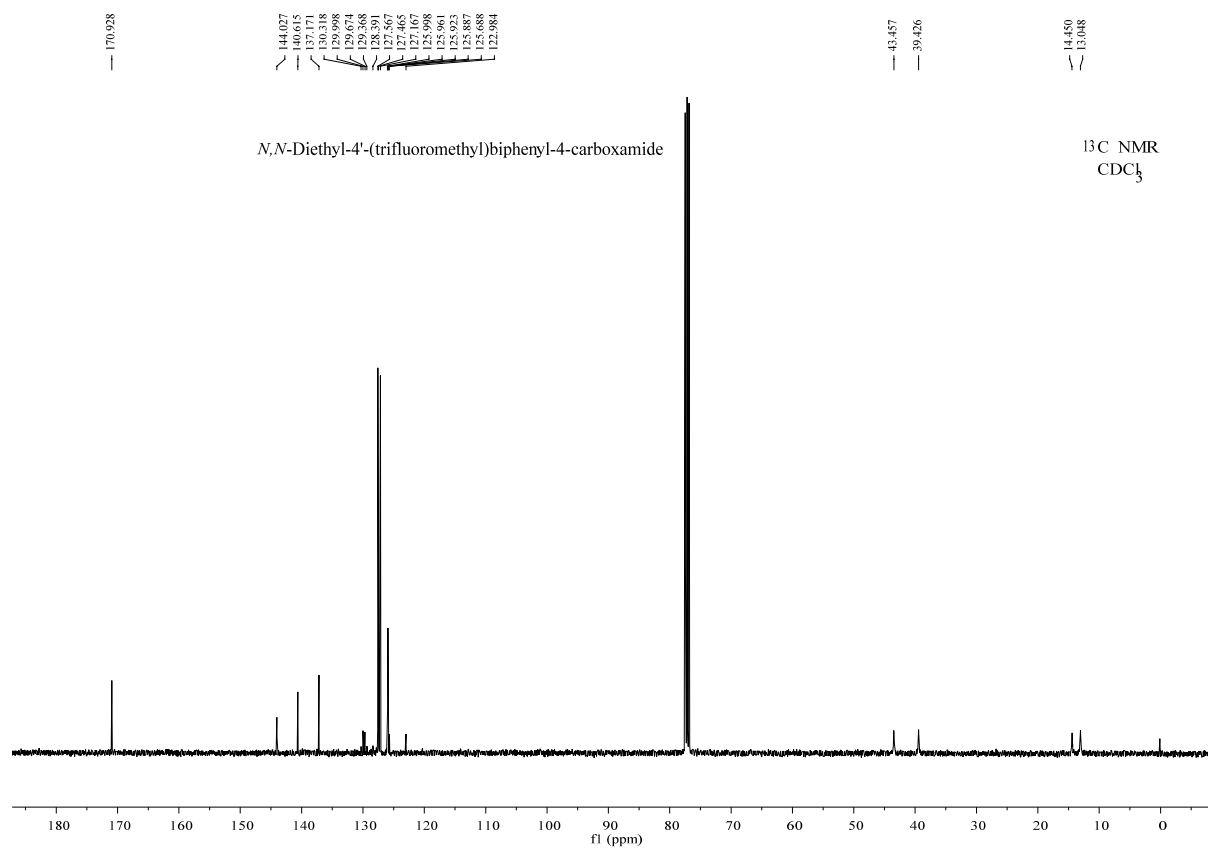

## 26. 4'-(Trifluoromethyl)biphenyl-3-yl pivalate

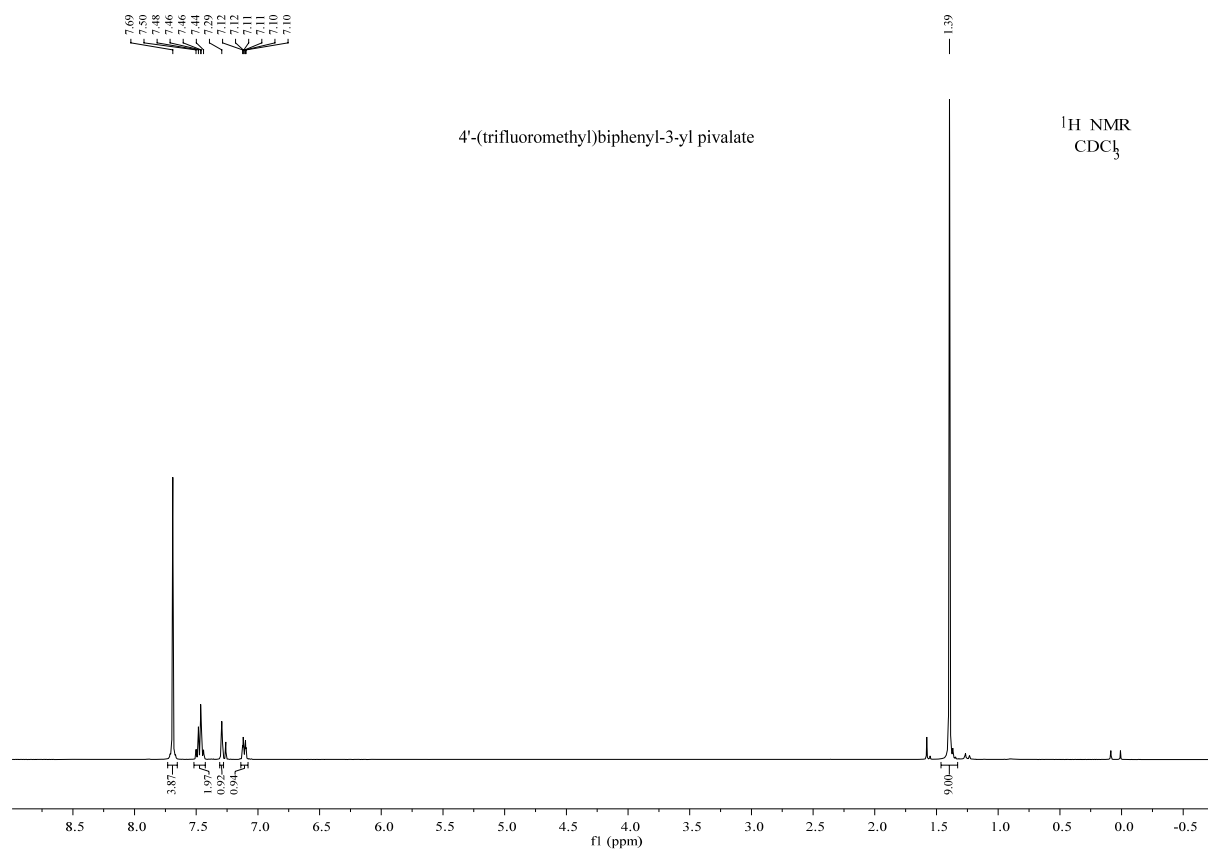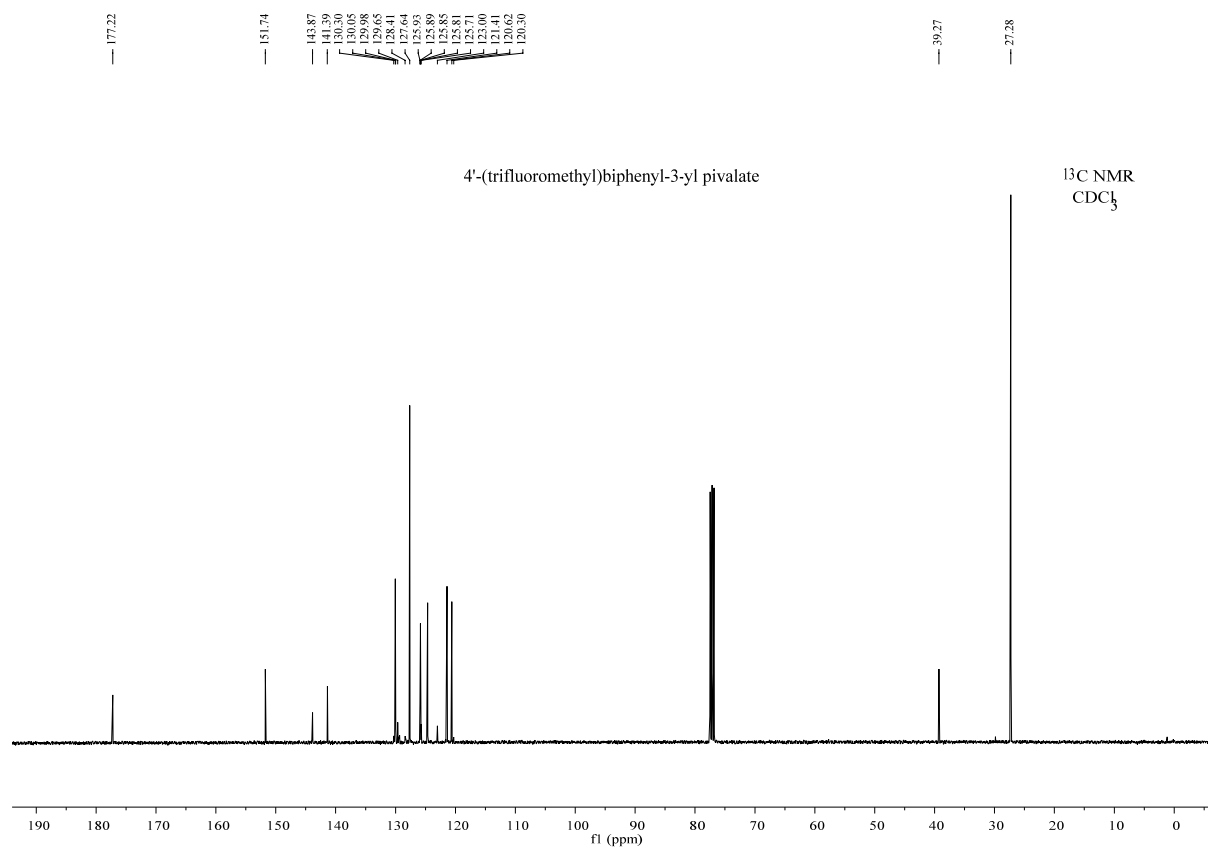

# 27. (4-(Furan-2-yl)phenyl)(phenyl)methanone

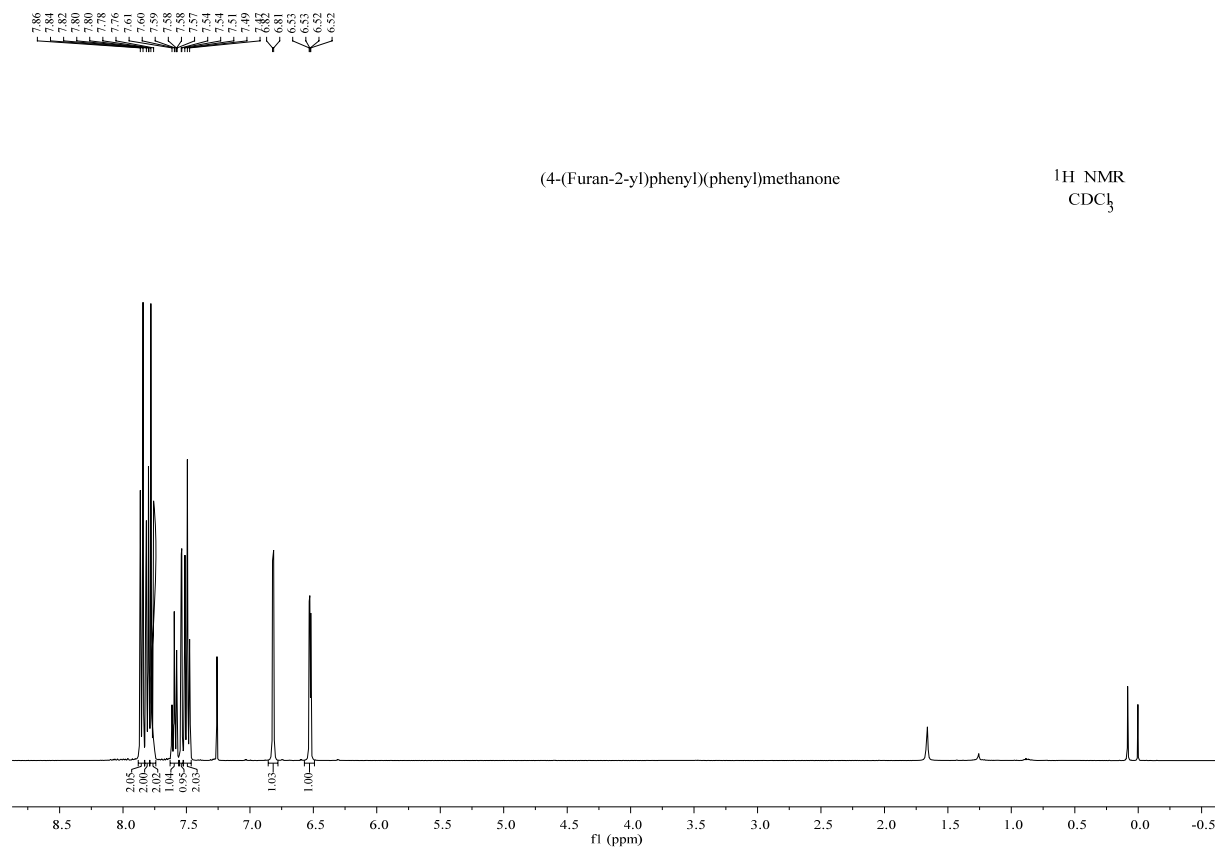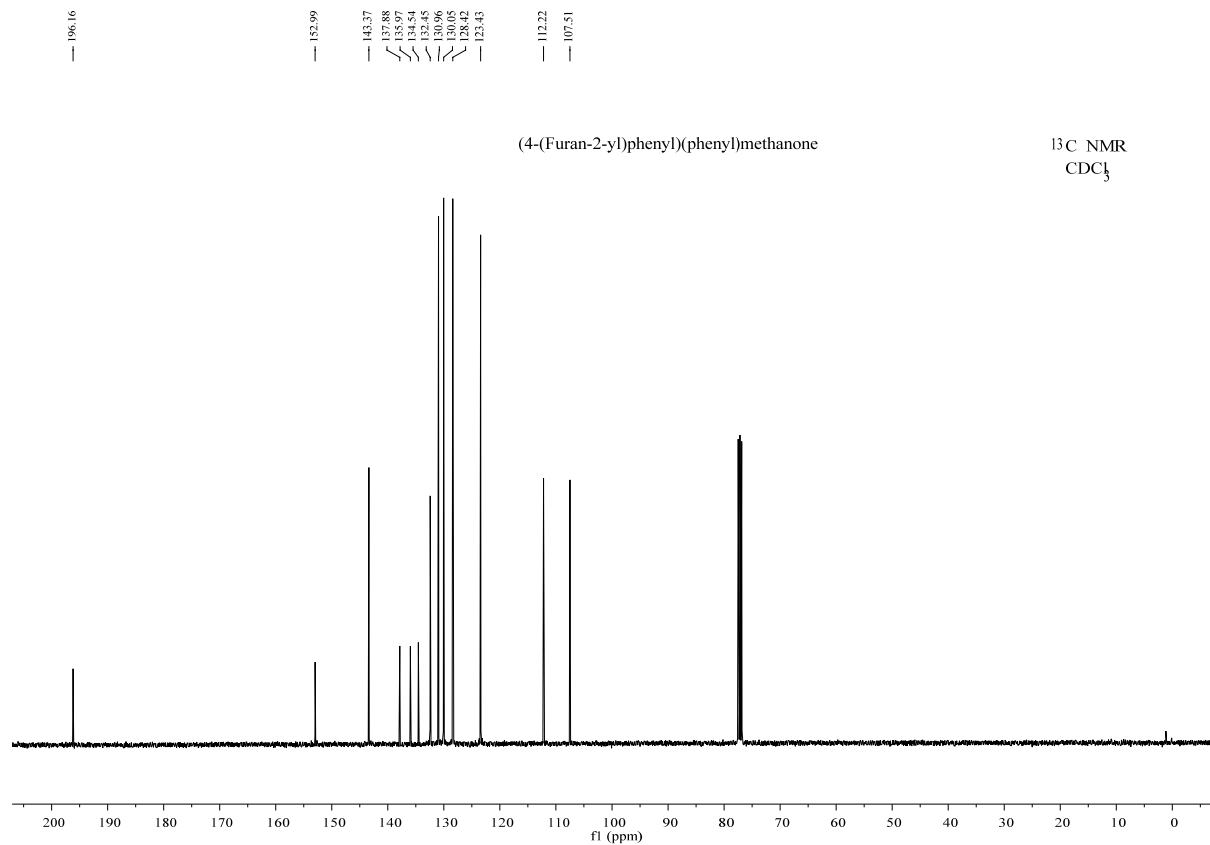

## 28. Ethyl 4-(furan-2-yl)benzoate

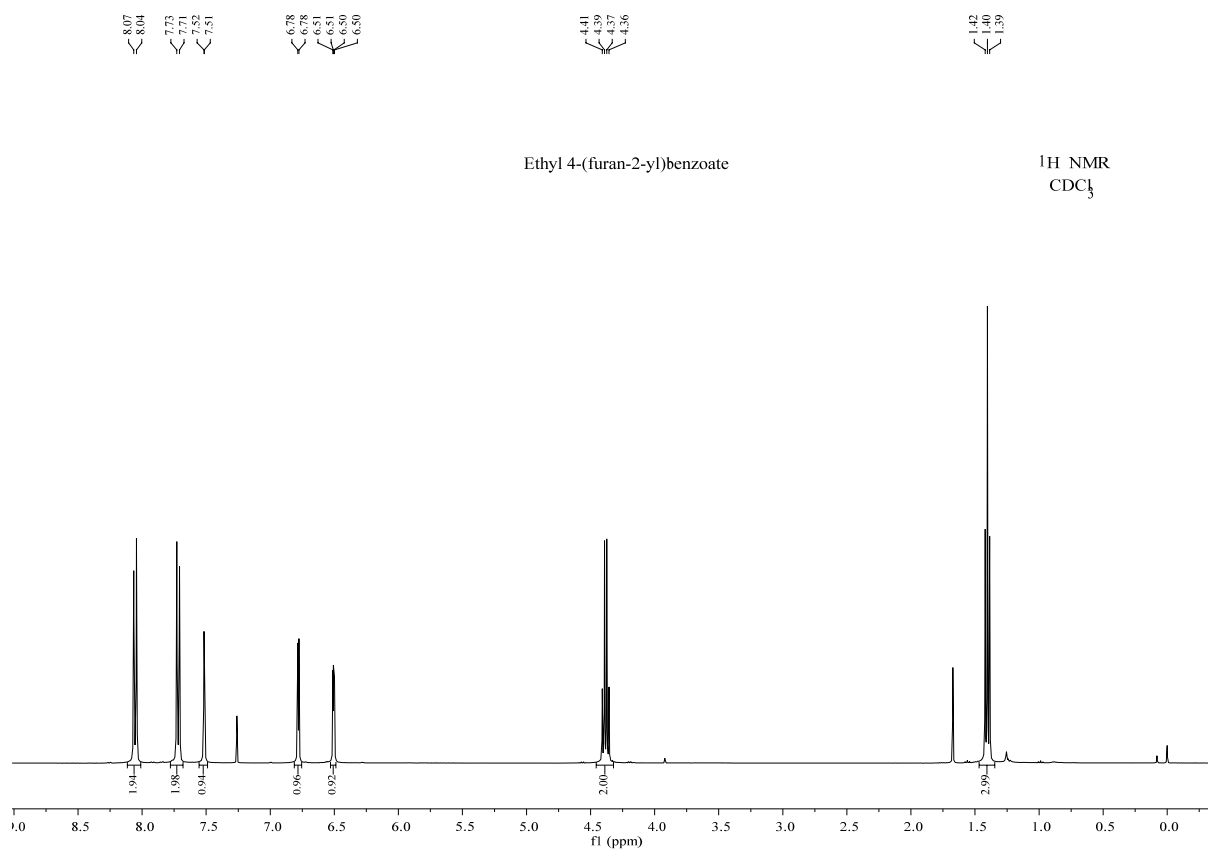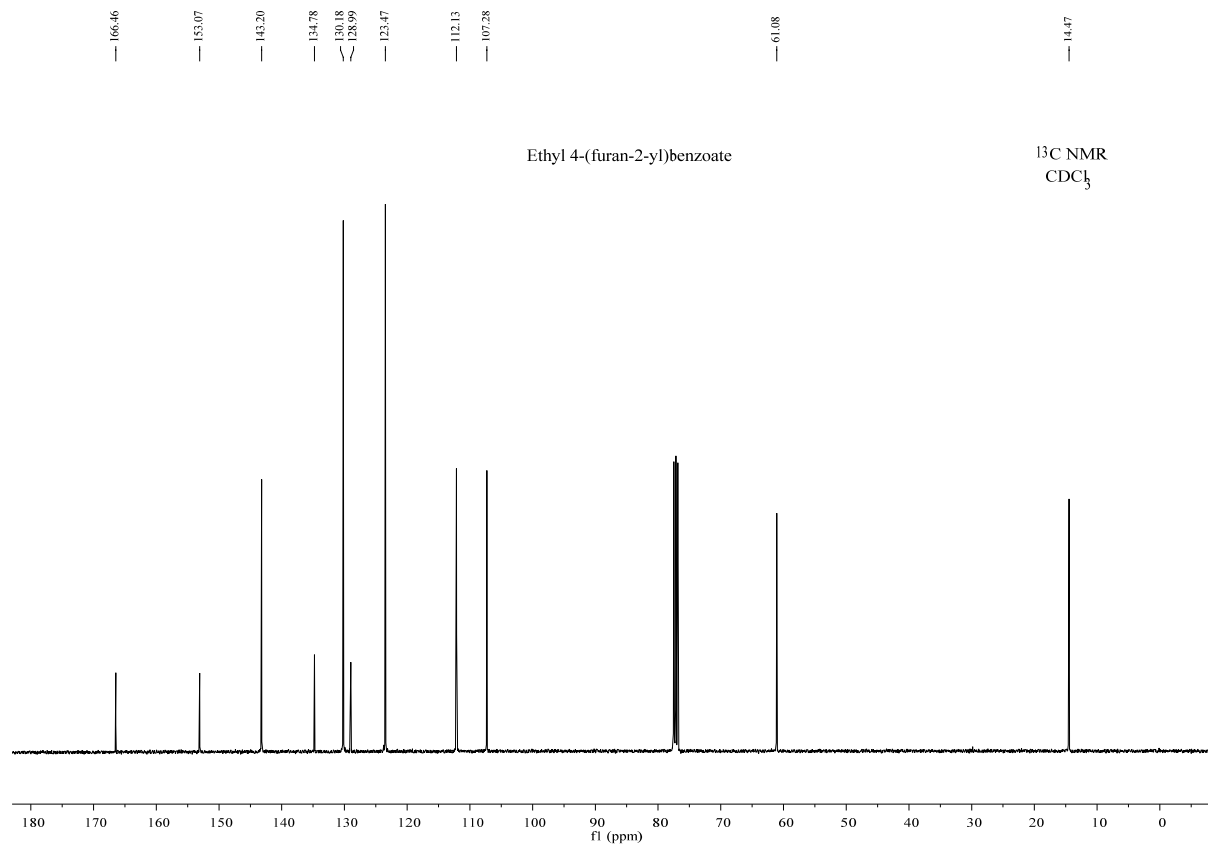

## 29. 2-Naphthalen-1-yl-furan

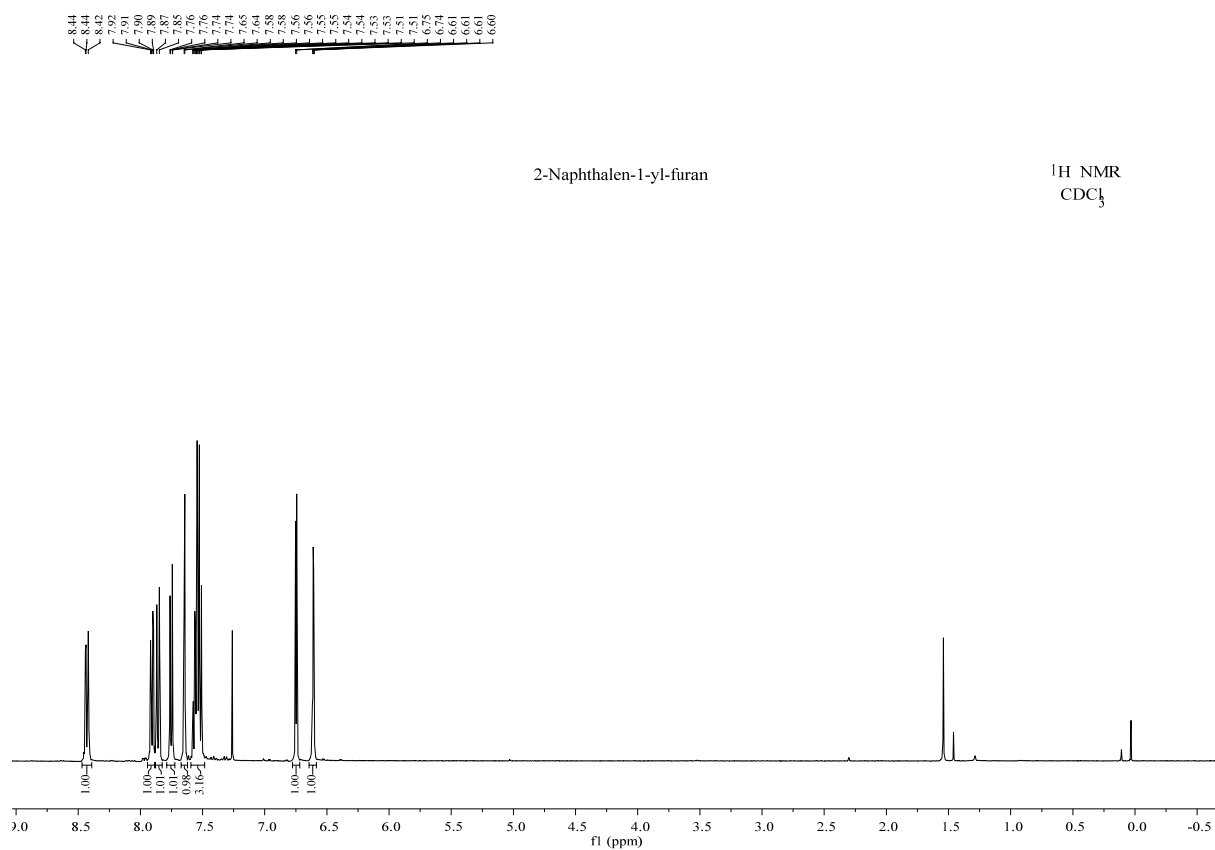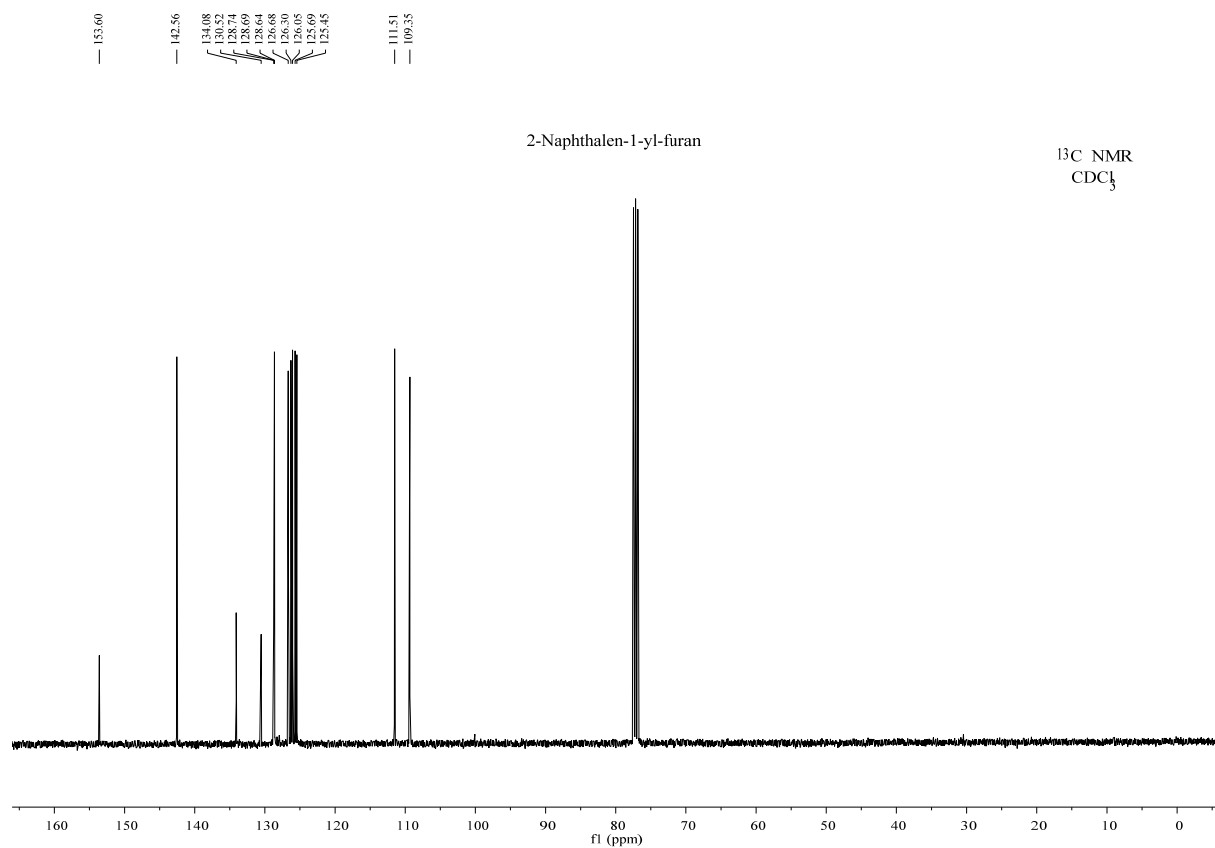

### 30. Phenyl-(4-thiophen-2-yl-phenyl)methanone

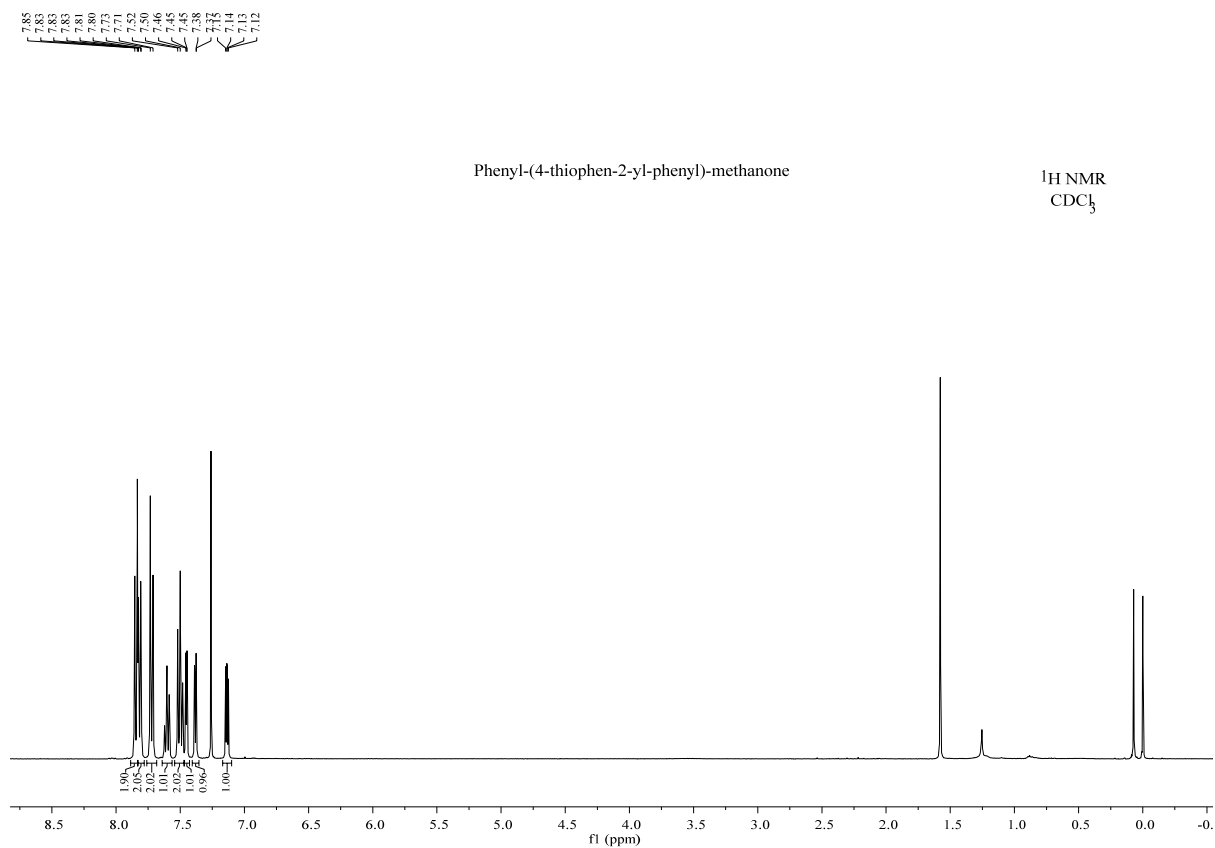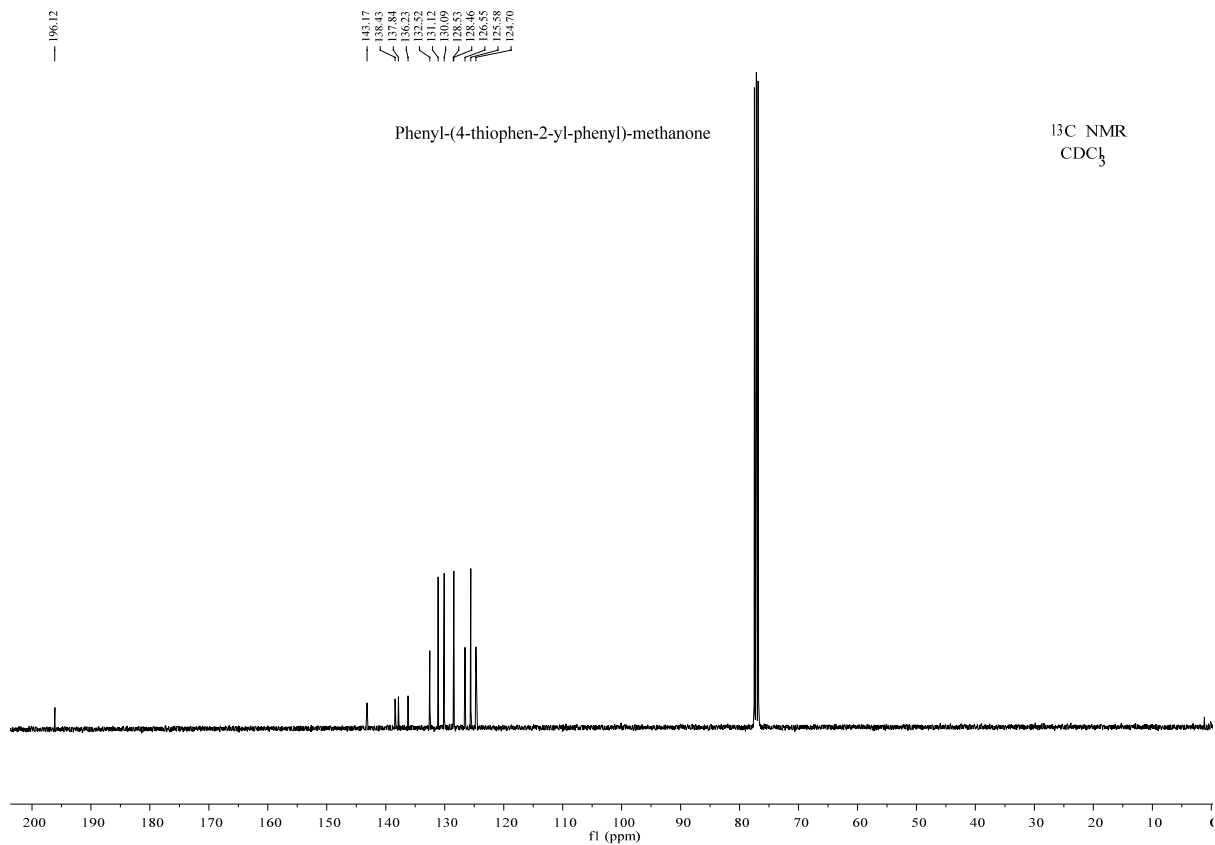



### 31. Ethyl 4-(thiophen-2-yl)benzoate

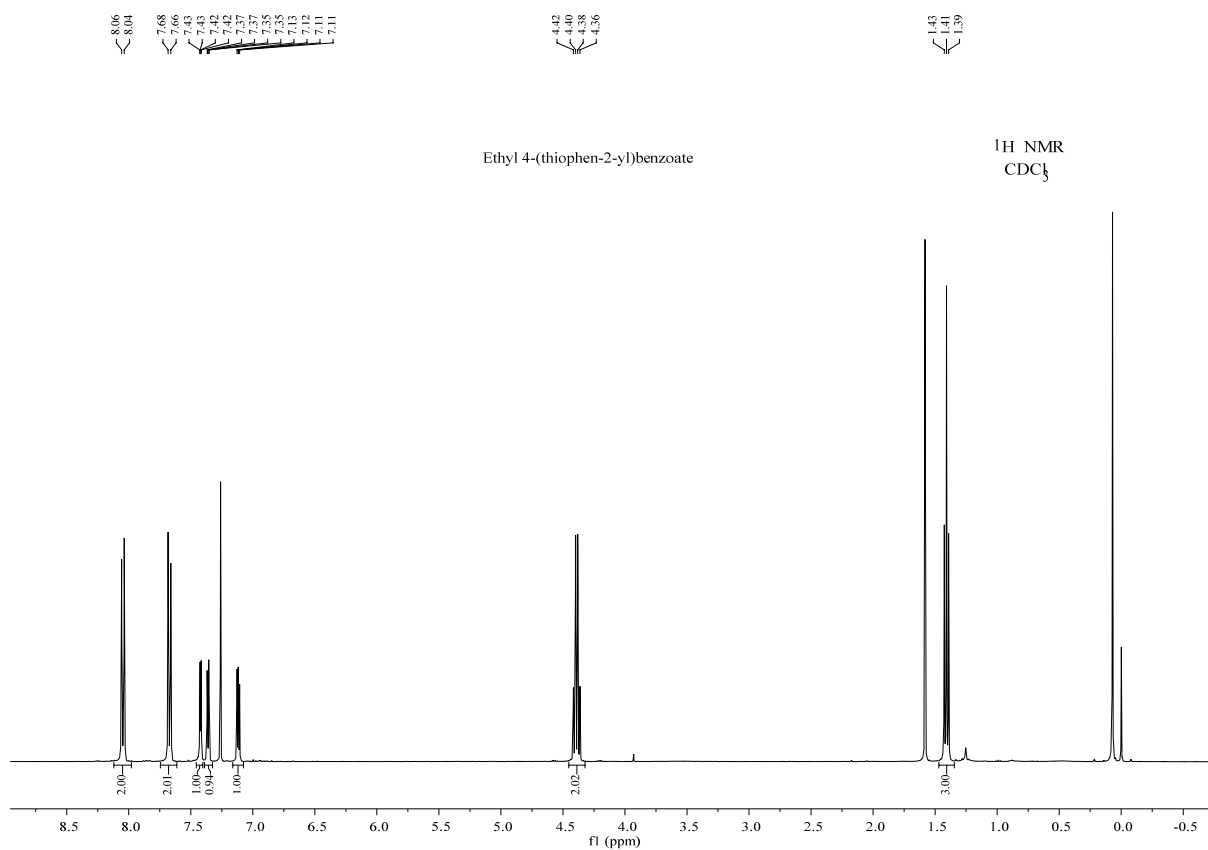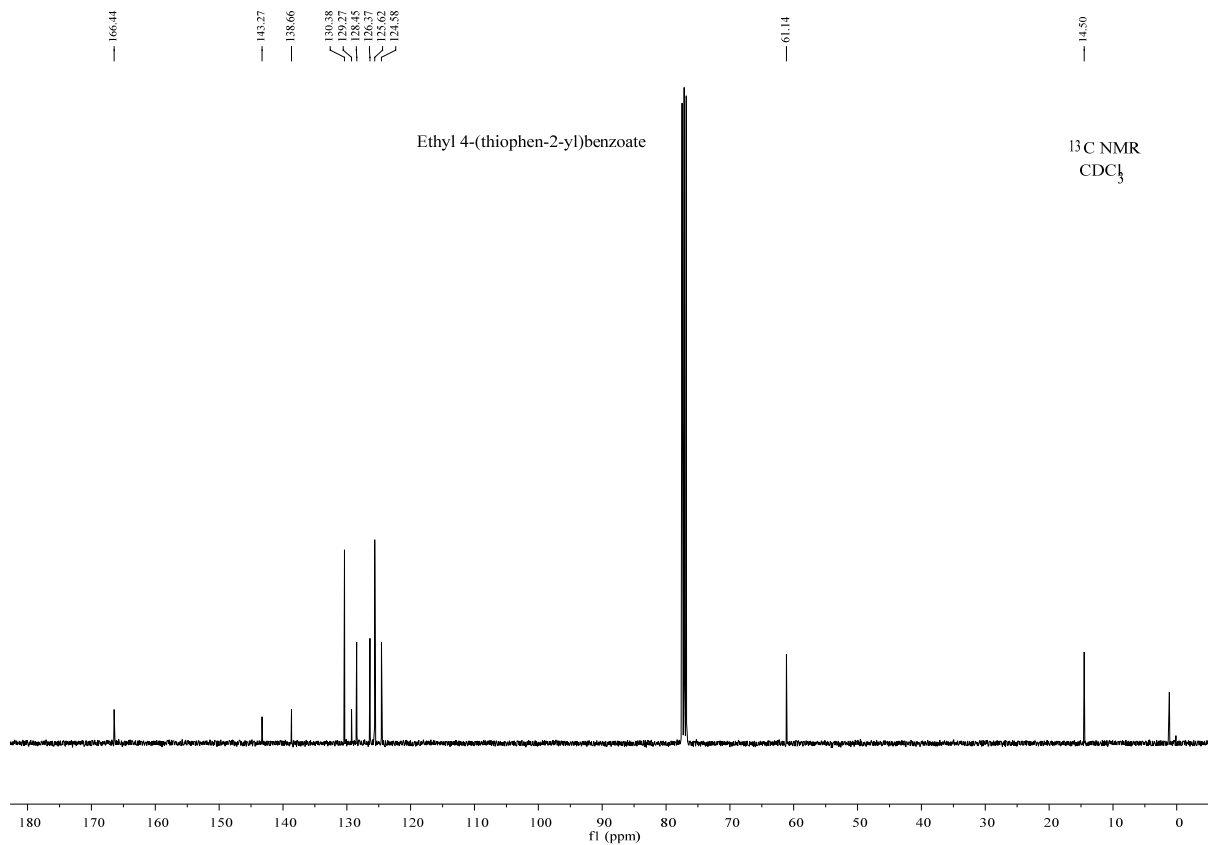

## 32. 2-Naphthalen-1-yl-thiophene

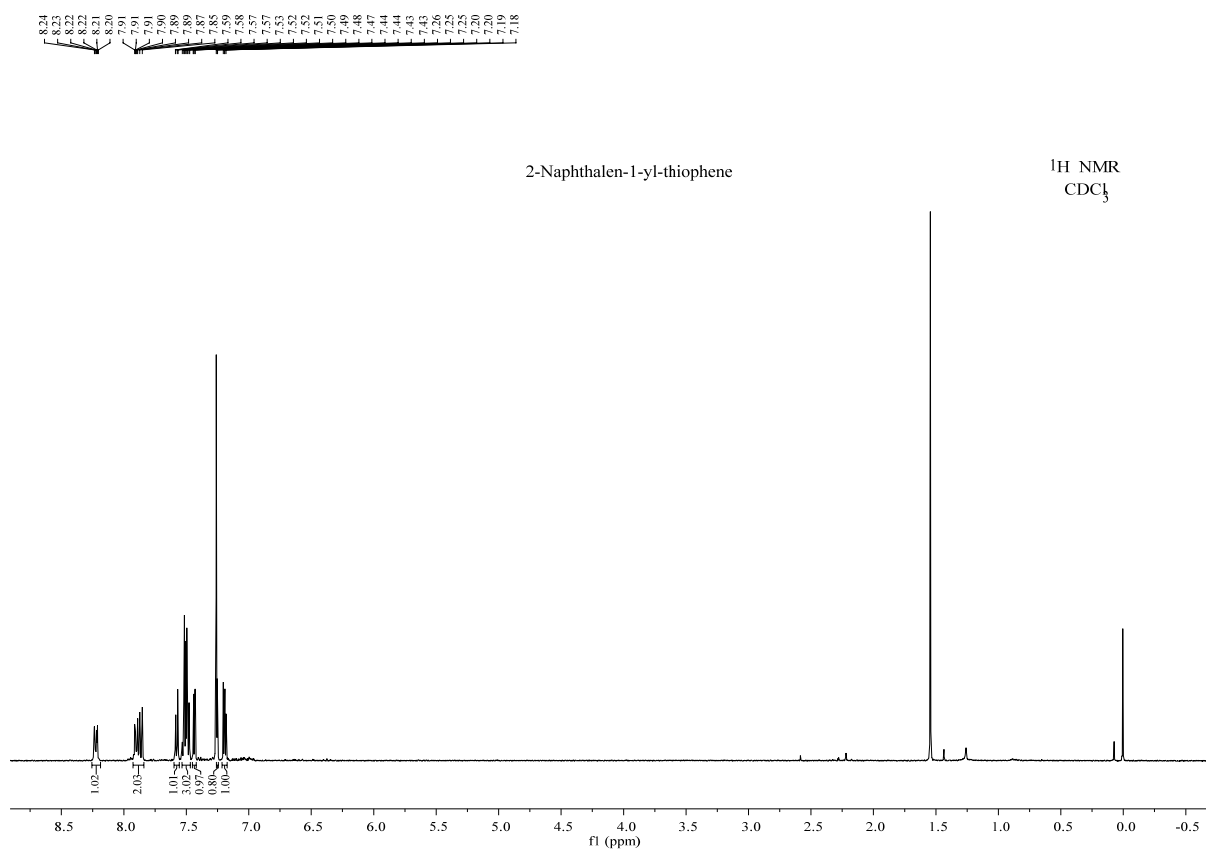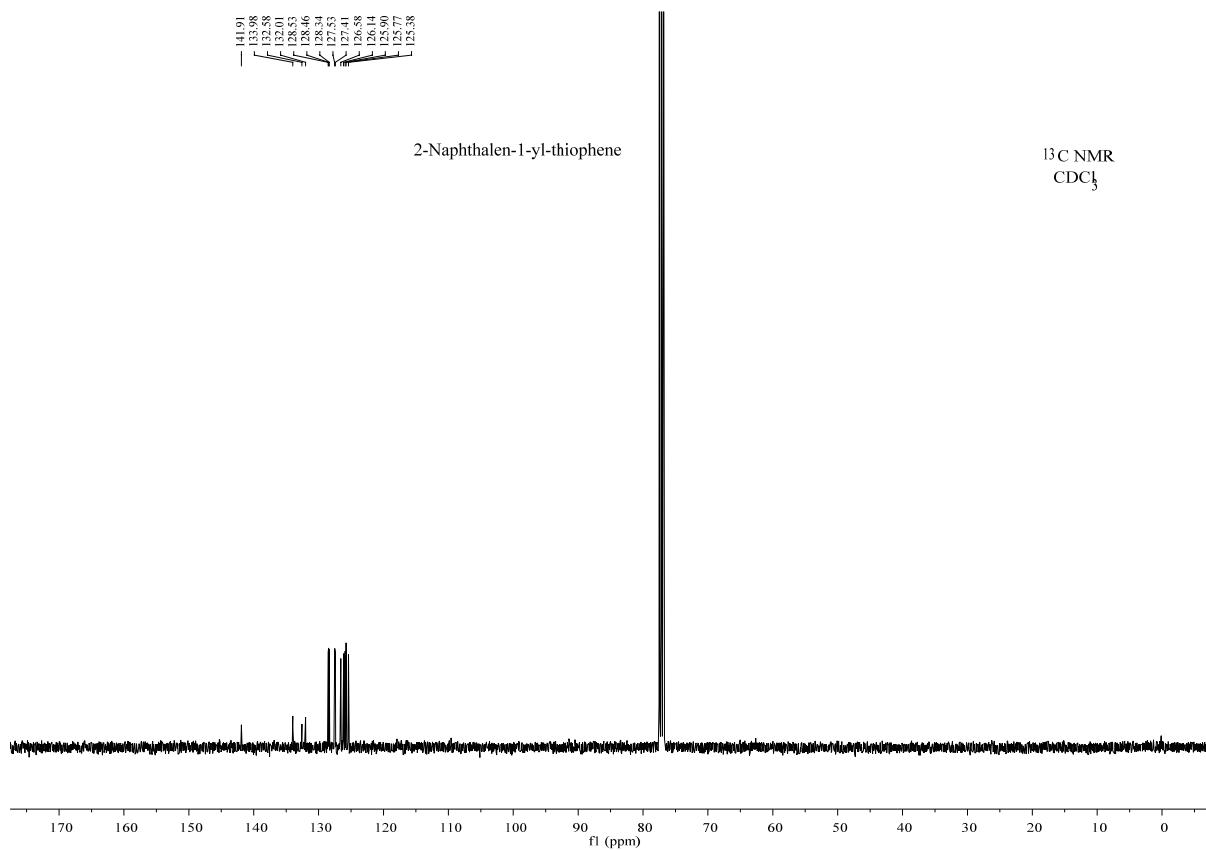

Supplement: c4qo00321g1.pdf [file c4qo00321g1.pdf]
